# Supplementary material for: Insulin receptor substrates differentially exacerbate insulin-mediated left ventricular remodeling
Source: JCI journal article supplement (doi:10.1172/jci.insight.134920), 2020-03-25
Supplement: sd1 [file 1]

## **SUPPLEMENTAL MATERIAL**

**for**

### **Insulin Receptor Substrates Differentially Exacerbate Insulin-Mediated Left Ventricular Remodeling**

Christian Riehle, Eric T. Weatherford, Adam R. Wende, Bharat P. Jaishy, Alec W. Seei, Nicholas S. McCarty,  
Monika Rech, Qian Shi, Gopireddy R. Reddy, William J. Kutschke, Karen Oliveira, Karla Maria Pires,  
Joshua C. Anderson, Nikolaos A. Diakos, Robert M. Weiss, Morris F. White, Stavros G. Drakos,  
Yang K. Xiang, E. Dale Abel

## **Supplemental Methods**

### *Transverse aortic constriction (TAC)*

In our early studies, TAC procedures were performed on mice at 6 weeks of age and a titanium clip calibrated to the diameter of a 30-G needle was placed between the innominate artery and the left common carotid artery as previously described. The Sham procedure was performed identically, except no clip was placed around the aortic arch (1). We subsequently modified our protocol to tighten a 7-0 Prolene suture around a blunt 27-G needle, which was placed between the innominate artery and the left common carotid artery (2). Mice subjected to this protocol have been investigated for a maximum duration of 2 weeks. Mice for the 2-day and 3-day time point were operated at the age of 6 weeks and for the 2-week time point at 8 weeks of age. These data are presented in Figures 1D-G, 6, 7, Supplemental Figures 1E, 6, 7 and Supplemental Tables 1 and 3. All other data were generated using our previous surgery protocol. Both surgery protocols resulted in a similar increase in the pressure gradient following TAC, which was independent of the genotype (Supplemental Figure 1). Invasive measurements using left ventricular (LV) catheterization showed no difference in LV systolic pressure and LV developed pressure under Sham conditions between the genotypes (Supplemental Table 4). Furthermore, we observed equivalent increase in mean arterial pressure proximal to the band, four weeks post-TAC, which was independent of the genotype (data not shown). Even though not directly measured, these data indicate that TAC resulted in a similar increase in workload independent of the genotype.

### *Transthoracic echocardiography*

Echocardiographic data obtained from sedated CIRS1KO and CIRS2KO mice (depicted in Supplemental Table 2) were acquired and calculated as follows: Anesthesia was induced with 3% isoflurane and followed by maintenance at 1 to 2%. Mice were placed on a heating pad (37 °C), chest hair was removed with a depilatory agent and pre-warmed ultrasonic gel was applied. Echocardiographs immediately post-surgery (indicated as 0 week time point in Supplemental Table 2 and presented in Supplemental Figure 1C/D) was performed with isoflurane anesthesia. B-mode images in parasternal long- and short-axis projections (at the papillary muscle level) were obtained using a Vivid 7 Pro ultrasound machine with a 13 MHz linear probe (GE Medical Systems, Milwaukee, WI). M-mode recordings were obtained in both views (2). Fractional shortening [%] was calculated as  $[(LVDd - LVDs) / LVDd] * 100$ , where LVDd = LV diastolic dimension and LVDs = LV systolic dimension. Ejection fraction [%] was calculated as  $[(LVDd^3 - LVDs^3) / LVDd^3] * 100$ .

Data from CIRS2KO x Akt1<sup>het</sup> cross experiments (presented in Figure 3D/E and in Supplemental Table 6) were acquired using the same isoflurane anesthesia protocol and a Vevo 660 ultrasound machine with a 40 MHz linear probe (VisualSonics Inc., Toronto, Ontario, Canada). B-mode images were obtained in both parasternal long- and short-axis projections (at the papillary muscle level). M-mode images were generated from short axis projections and were used to measure LV dimensions. Ejection fraction and fractional shortening was determined by speckle tracking of the LV endocardium in long axis view using VevoStrain software (3).

We subsequently modified our protocol to perform echocardiograms on non-sedated mice using a Vevo 2100 ultrasound machine (VisualSonics Inc.) as previously described (4). These data are presented in Figures 1D-G and Supplemental Table 1. Chest hair of the mice was removed with a depilatory agent the day before the echocardiographic examination. Non-sedated conscious mice were grasped gently by the nape of the neck and cradled in the investigator's left hand, approximating a left lateral recumbent position. Echocardiography was performed at 2-days, 2-weeks and 4-weeks post-TAC. We observed variability in some echocardiographic parameters in the Sham groups at 2-days, which were not present at 2-weeks or 4-weeks, which may reflect physiological responses in the immediate post-op period and acclimation of mice to repeated echocardiography at later time points. Pre-warmed acoustic gel was applied to the mouse's chest. Two-dimensional B-mode images were acquired in parasternal long- and short-axis planes using a high-resolution MS400 transducer coupled to a Vevo 2100 echocardiograph (VisualSonics Inc.). In mice, orientation of the heart near-parallel to the spine affords visualization of the entire length of the left ventricle, from a parasternal vantage point. Short-axis frames were acquired at the level of the chordae tendineae. End-diastole was visually identified in each plane as the echocardiographic frame where LV endocardial area was greatest. End-systole was visually identified as the frame where LV endocardial area was least. Short-axis endocardial silhouettes were traced manually, yielding short-axis endocardial area at end-diastole and end-systole. LV long-axis length was measured between the endocardial apex and the mid-point of the aortic valve annulus, at end-diastole and end-systole. LV blood volumes were calculated using the following established formula:  $\text{Volume} = 0.833 * (\text{short-axis area}) * (\text{long-axis length})$ .

This convention was employed because it provides accurate echocardiographic quantitation of LV mass, where postmortem LV wet weight was used as the reference standard (5). Because echocardiographic calculations of LV mass were based on measurements of both endocardial and epicardial measurements of area-length, accuracy of the endocardial measurements performed here, in the same fashion, is strongly inferred. Ejection fraction [%] was calculated

as  $(EDV - ESV) / EDV$ , where  $EDV$  = LV end-diastolic volume and  $ESV$  = LV end-systolic volume. Heart rate was determined by measuring the time required to complete a cardiac cycle, averaged over three consecutive beats.

All echocardiographic images were generated and analyzed by investigators blinded to genotype and surgery condition.

#### *Measurement of TAC-induced pressure gradient*

##### Measurement of carotid artery peak velocity

Doppler peak velocity of the right and left carotid artery was determined using a 13 MHz Doppler probe immediately post-surgery. The peak flow velocity difference of the right / left carotid artery was used to determine the TAC-induced pressure gradient (Clip method) (2, 6, 7). Transthoracic echocardiography showed no difference in contractile function and heart rate at this early time point between the genotypes (Supplemental Table 2 and Supplemental Figure 1C/D).

##### Measurement of trans-TAC pressure gradient

Measurements were performed one day post TAC-surgery (suture method) following anesthesia with isoflurane (4). The transverse aorta was visualized by transthoracic echocardiography and transverse aortic velocity distal to the constriction was determined by pulsed-wave Doppler measurement. The pressure gradient was estimated by applying the modified Bernoulli equation ( $\text{Maximum pressure gradient} = 4 * V_{\text{max}}^2$ , where  $V_{\text{max}}$  = peak velocity distal the TAC-induced stenosis) (8).

#### *Hemodynamic studies*

Mice were anesthetized (single intraperitoneal injection of 400 mg chloral hydrate / kg body weight) and placed in the supine position on a heating pad (37 °C). The right carotid artery was accessed by the cut down method. Next, a 1.4-F micromanometer-tipped pressure catheter (Millar Instruments, Houston, TX) was inserted and retrogradely introduced into the left ventricle. Hemodynamic measurements were obtained using LabChart7 Pro software (ADInstruments, Colorado Springs, CO) (2).

#### *Histology and stereological quantification*

Myocardial fragments were embedded in paraffin, portioned into 3  $\mu\text{m}$ -thick sections and stained with hematoxylin-eosin (Fisher, Pittsburgh, PA) or Masson's trichrome (Sigma-Aldrich, St. Louis, MO). Light microscopy was performed using an Olympus LX81 inverted microscope that was connected to an Olympus Microfire Digital Camera (New York, NY). From

each sample, ten microscopic fields of myocardial sections were analyzed at random with a 36-point test-system, the stage of the microscope being moved blindly.

For stereological quantification, the number of cardiomyocyte nuclei detected was normalized to the test area. Volume density ( $V_v$ ) of cardiomyocytes ( $V_v_{[CMY]}$ ) and interstitium ( $V_v_{[Int]}$ ) was estimated as follows:  $V_v_{[Structure]} = P_P_{[Structure]} / P_T$ , where  $P_P_{[Structure]}$  is the number of points that hit the structure and  $P_T$  is the total number of test-points inside the frame. Mean cross-sectional area of cardiomyocytes  $A_{[CMY]}$  was estimated as follows:  $A_{[CMY]} = V_v_{[CMY]} / 2Q_A_{[CMY]}$ ; where  $Q_A_{[CMY]} = n_{[CMY]} / A_T$ ;  $n_{[CMY]}$  is the number of cardiomyocyte profiles counted in the test frame area, and  $A_T$  is the test frame area considering the forbidden line and its extensions (9).

### *Immunoprecipitation*

Total protein extraction was performed as previously reported (2). For Akt isoform-specific immunoprecipitation, 500 µg of protein extracts were incubated with 5 µg of anti-Akt1 or anti-Akt2 antibodies (Cell Signaling, Danvers, MA) for 3 h at constant agitation at 4 °C, agarose beads (Millipore Corp., Billerica, MA) were added, incubated for 1 h, and washed four times. Immune complexes were resuspended in 30 µl of 2x SDS sample buffer containing 5% β-Mercaptoethanol and were incubated for 5 min at 95 °C. Next, samples were centrifuged for 1 min at 8,000 g and subjected to immunoblotting analysis with antibodies to Ser473/474 and Thr308/309 of Akt1 and Akt2 respectively.

### *Immunoblotting*

Total protein extraction was performed as previously reported (2). Proteins were resolved by SDS-PAGE and electrotransferred to nitrocellulose (IRS proteins, P-mTOR and total mTOR) or PVDF membranes (other targets). Primary antibodies used are summarized in the table below. Protein detection was carried out with anti-Rabbit 680 (Invitrogen, Carlsbad CA), anti-Mouse 680 (VWR International, West Chester, PA) and anti-Mouse 800 (VWR) as secondary antibodies, and fluorescence was quantified using the LI-COR Odyssey imager (Lincoln, NE).

| <b>Antigen</b>        | <b>Company</b>                       | <b>Catalog number</b> |
|-----------------------|--------------------------------------|-----------------------|
| 4E-BP1                | Abcam, Cambridge, MA                 | 2606                  |
| Akt1                  | Cell Signaling, Danvers, MA          | 2938                  |
| Akt2                  | Cell Signaling, Danvers, MA          | 3063                  |
| GAPDH                 | Cell Signaling, Danvers, MA          | 2118                  |
| IRS1                  | Millipore, Billerica MA              | 06-248                |
| IRS2                  | Millipore, Billerica MA              | 06-506                |
| P-4E-BP1 Thr37/46     | Cell Signaling, Danvers, MA          | 2855                  |
| P-Akt Ser473          | Cell Signaling, Danvers, MA          | 9271                  |
| P-Akt Thr308          | Cell Signaling, Danvers, MA          | 9275                  |
| PDE9A                 | Millipore, Billerica MA              | ABN32                 |
| P-eNOS Ser1177        | Cell Signaling, Danvers, MA          | 9571                  |
| P-FoxO3a Ser318/321   | Cell Signaling, Danvers, MA          | 9465                  |
| PKG1                  | Cell Signaling, Danvers, MA          | 3248                  |
| P-mTOR Ser2448        | Cell Signaling, Danvers, MA          | 2971                  |
| P-S6 Ser235/236       | Cell Signaling, Danvers, MA          | 2211                  |
| P-Troponin I Ser23/24 | Cell Signaling, Danvers, MA          | 4004                  |
| Total Akt             | Cell Signaling, Danvers, MA          | 2920                  |
| Total eNOS            | BD Biosciences, San Jose CA          | 610297                |
| Total FoxO3a          | Santa Cruz Biotechnology, Dallas, TX | 9813                  |
| Total mTOR            | Cell Signaling, Danvers, MA          | 4517                  |
| Total S6              | Cell Signaling, Danvers, MA          | 2317                  |
| Total Troponin I      | Cell Signaling, Danvers, MA          | 13083                 |

### *Kinomic profiling*

#### Tissue preparation and kinomic analysis

LV tissue obtained four weeks post-surgery was prepared as previously described and subjected to serine-threonine kinase (STK) and tyrosine kinase (PTK) profiling analysis (10). Kinomic profiling was performed using the PamStation®12 platform (PamGene, s-Hertogenbosch, Netherlands) at the University of Alabama, Birmingham, Kinome Core facility ([www.kinomecore.com](http://www.kinomecore.com)). PamChips® were used that contained 144 individual serine-threonine phosphorylatable peptides (STK) or 144 tyrosine phosphorylatable peptides (PTK) that were immobilized in the chip. After blocking with 2% bovine serum albumin (BSA), lysates were dissolved in manufacturer's kinase buffer (PamGene) and loaded (2 µg/well for STK or 15 µg/well for PTK), and exogenous ATP was added together with FITC-labeled anti-phospho serine-threonine antibodies (STK) or anti-phospho tyrosine antibodies (PTK). Peptide phosphorylation signal was detected in real time by capturing the binding of FITC-labeled anti-phospho serine-threonine antibodies (STK) or anti-phospho tyrosine antibodies (PTK) to each phosphorylated peptide substrate with images captured approximately every 5.5 minutes over the total duration of 50 (STK) or 70 (PTK) minutes, followed by multiple exposure captures over 10 minutes. Signal intensities for each peptide were analyzed using the BioNavigator software package (PamGene) (11).

### Data Analysis

Briefly, signal over multiple exposure times (10, 20, 50, 100, and 200 ms) was linearly integrated for each sample and peptide. The slope was log2 transformed as described previously (12). These data were used as 'Signal' for further analysis, and for heat map display (Supplemental Table 9). Peptides were compared using unpaired Student's t tests between experimental conditions. Significantly altered ( $p < 0.05$ ) peptides were then mapped for upstream kinases using a modified query of the Kinexus database, which scored each kinase based on the percentage of times it occurred, in a phosphorylatable-residue-corrected manner, within the top 10 list for each phosphorylatable peptide as before (10). Upstream kinases were then uploaded by UniProt ID to GeneGo MetaCore ([portal.genego.com](http://portal.genego.com)) and mapped using the Shortest Paths (2-step) network model without filters for tissue or species to identify literature annotated interactions between the kinases (seed nodes).

### *RNA sequencing analysis*

RNA sequencing was done by the Iowa Institute of Human Genetics: Genomics Division at the University of Iowa. Using the Illumina TruSeq Stranded mRNA sample preparation kit, thirty-six libraries (Illumina, Inc., San Diego, CA) were prepared following Illumina's sample preparation guide. The Illumina Library Quantification Kit (KAPA Biosystems, Wilmington, MA) was used to measure molar concentrations of the indexed libraries and combined equally into one pool. Molar concentration of the pool was measured and sequenced on the Illumina HiSeq 2000 sequencer with a 100 bp Paired-End SBS chemistry (Illumina). Sequences were aligned to the mouse genome (GRCm38/mm10) using HISAT2 (hierarchical indexing for spliced alignment of transcripts). Reads were counted using HTSeq and differential gene expression analysis performed using DESeq2 (13, 14). Significantly regulated genes were defined as those with a fold change greater than 1.5 and adjusted p-value  $\leq 0.05$ . Enrichment for pathways and upstream regulators in each data set was performed using Ingenuity Pathway Analysis (IPA; QIAGEN, Germantown, MD). Predictions on pathway or regulator activation or inhibition determined by IPA were made by assessing the correlation between the directional changes in gene expression and what is known in the literature.

### *Quantitative RT-PCR*

RNA from cardiac tissue was extracted and quantitative real-time PCR analysis was performed using SYBR Green I and ROX internal reference. The following primers were used for quantification of mRNA levels by RT-PCR:

| Gene Name<br>Gene Sequence of forward and reverse primers (5' → 3')<br>GenBank Accession Number                           |
|---------------------------------------------------------------------------------------------------------------------------|
| Actin, alpha 1, skeletal muscle ( <i>Acta1</i> )<br>CCTGTATGCCAACAACGTCA<br>CTCGTCGTA CTCTGCTTGG<br>NM_001272041.1        |
| Chemokine (C-C motif) ligand 4 ( <i>Ccl4</i> )<br>CTTCTGTGCTCCAGGGTTCTCA<br>GCTCACTGGGGTTAGCACAGAT<br>NM_013652.2         |
| Chemokine (C-X3-C motif) ligand 1 ( <i>Cx3cl1</i> )<br>TGGCTTTGCTCATCCGCTATCAG<br>CGTCTGTGCTGTGTCGTCTCC<br>NM_009142.3    |
| Chemokine (C-X-C motif) ligand 10 ( <i>Cxcl10</i> )<br>ATGACGGGCCAGTGAGAATG<br>ATTCTTTTTCATCGTGGCAATGA<br>NM_021274.2     |
| Chemokine (C-X-C motif) ligand 16 ( <i>Cxcl16</i> )<br>CTTTATCAGGTTCCAGTTGCAGT<br>CCCATGACCAGTTCCACACT<br>NM_023158.7     |
| Colony stimulating factor 1 (macrophage) ( <i>Csf1</i> )<br>CAGGAGTATTGCCAAGGAGGT<br>GATCATCCAGCTGTTCTGGTC<br>NM_007778.4 |
| Cyclophilin A ( <i>Cphn</i> )<br>AGCACTGGAGAGAAAGGATTTGG<br>TCTTCTTGCTGGTCTTGCCATT<br>NM_008907.1                         |
| Interleukin 1 beta ( <i>Il1b</i> )<br>TGCCACCTTTTGACAGTGATG<br>TGATGTGCTGCTGCGAGATT<br>NM_008361.4                        |
| Natriuretic peptide precursor type A ( <i>Nppa</i> )<br>ATGGGCTCCTTCTCCATCA<br>CCTGCTTCCTCAGTCTGCTC<br>NM_008725.3        |
| Natriuretic peptide precursor type B ( <i>Nppb</i> )<br>GGATCTCCTGAAGGTGCTGT<br>TTCTTTTGTGAGGCCTTGGT<br>NM_008726.5       |
| Ribosomal protein S16 ( <i>Rps16</i> )<br>TGCTGGTGTGGATATTCGGG<br>CCTTGAGATGGGCTTATCGG<br>NM_013647.2                     |
| Tumor necrosis factor ( <i>Tnfa</i> )<br>GATCGGTCCCCAAAGGGATG<br>GTGGTTTGCTACGACGTGGG<br>NM_013693.3                      |



## Supplemental Tables

**Supplemental Table 1:** Contractile function assessed by transthoracic echocardiography in WT, CIRS1KO and CIRS2KO mice (non-sedated mice)

| Group (n)        | Time post-surgery | HR [bpm]<br>\$  | Area;d [mm <sup>2</sup> ]<br>#,\$,& | Area;s [mm <sup>2</sup> ]<br>#,\$,& | Majr;d [mm]<br>#,\$ | Majr;s [mm]<br>#,\$,& | EDV [μl]<br>#,\$,& | ESV [μl]<br>#,\$,& | LV mass [mg]<br>#,\$   | SV [μl]<br>#,\$ | CO [ml/min]<br>\$   | CI [ml/min/g]<br>\$ | EF [%]<br>#,\$,& |
|------------------|-------------------|-----------------|-------------------------------------|-------------------------------------|---------------------|-----------------------|--------------------|--------------------|------------------------|-----------------|---------------------|---------------------|------------------|
| WT Sham (6)      | 2 d               | 457.5 ± 57.9    | 11.12 ± 1.12                        | 3.67 ± 0.74                         | 7.29 ± 0.18         | 6.11 ± 0.24           | 68.2 ± 8.6         | 19.1 ± 4.3         | 85.6 ± 3.0             | 49.1 ± 5.3      | 21.6 ± 1.8          | 0.97 ± 0.10         | 73.3 ± 4.0       |
| WT TAC (5)       | 2 d               | 507.2 ± 62.6    | 10.84 ± 1.46                        | 5.95 ± 1.16                         | 7.26 ± 0.39         | 6.02 ± 0.36           | 66.7 ± 11.1        | 30.9 ± 7.3         | 102.5 ± 9.1 †          | 35.8 ± 5.8      | 17.9 ± 3.5          | 0.87 ± 0.15         | 55.2 ± 5.1 †     |
| CIRS1KO Sham (6) | 2 d               | 422.2 ± 37.5    | 5.01 ± 0.58 *                       | 1.11 ± 0.13                         | 6.34 ± 0.27 *       | 5.14 ± 0.18           | 27.0 ± 4.1 *       | 4.8 ± 0.7          | 53.2 ± 2.9 *           | 22.2 ± 3.7 *    | 9.0 ± 1.2 *         | 0.60 ± 0.04 *       | 81.5 ± 1.9       |
| CIRS1KO TAC (6)  | 2 d               | 419.3 ± 51.2    | 8.95 ± 0.92 †                       | 6.05 ± 0.74 †                       | 6.94 ± 0.19         | 6.21 ± 0.19 †         | 52.4 ± 6.7 †       | 31.6 ± 4.4 †       | 77.3 ± 4.4 *†          | 20.8 ± 3.0 *    | 8.4 ± 1.2 *         | 0.58 ± 0.07         | 39.7 ± 3.4 †     |
| CIRS2KO Sham (6) | 2 d               | 624.3 ± 64.0 ‡  | 8.17 ± 0.61                         | 2.97 ± 0.72                         | 6.77 ± 0.22         | 5.64 ± 0.36           | 46.5 ± 4.8         | 14.7 ± 4.6         | 71.2 ± 3.5 *‡          | 31.8 ± 1.6 *    | 19.9 ± 2.3 ‡        | 0.93 ± 0.11 ‡       | 70.9 ± 5.3       |
| CIRS2KO TAC (7)  | 2 d               | 629.1 ± 33.4 ‡  | 13.01 ± 1.02 †‡                     | 10.21 ± 1.38 *†‡                    | 7.60 ± 0.18 †       | 6.66 ± 0.35 †         | 83.0 ± 7.9 †‡      | 58.3 ± 9.7 *†‡     | 101.2 ± 5.1 †‡         | 24.7 ± 2.1      | 15.5 ± 1.6 ‡        | 0.69 ± 0.06         | 32.9 ± 5.9 *†    |
|                  |                   |                 |                                     |                                     |                     |                       |                    |                    |                        |                 |                     |                     |                  |
| Group (n)        | Time post-surgery | HR [bpm]<br>\$  | Area;d [mm <sup>2</sup> ]<br>#,\$   | Area;s [mm <sup>2</sup> ]<br>#,\$,& | Majr;d [mm]<br>#,\$ | Majr;s [mm]<br>#,\$,& | EDV [μl]<br>#,\$,& | ESV [μl]<br>#,\$,& | LV mass [mg]<br>#,\$,& | SV [μl]<br>#,\$ | CO [ml/min]<br>\$,& | CI [ml/min/g]<br>\$ | EF [%]<br>#,\$,& |
| WT Sham (9)      | 2 wk.             | 663.0 ± 19.0    | 5.38 ± 0.22                         | 1.09 ± 0.06                         | 6.39 ± 0.13         | 5.28 ± 0.17           | 28.7 ± 1.3         | 4.8 ± 0.2          | 68.8 ± 4.0             | 23.9 ± 1.3      | 15.8 ± 0.7          | 0.65 ± 0.11         | 83.2 ± 1.0       |
| WT TAC (10)      | 2 wk.             | 660.0 ± 15.4    | 8.73 ± 0.98 †                       | 3.67 ± 1.21                         | 7.22 ± 0.15 †       | 6.14 ± 0.27 †         | 53.3 ± 6.9 †       | 20.6 ± 7.5         | 105.2 ± 5.4 †          | 32.7 ± 2.2 †    | 21.7 ± 1.7 †        | 0.93 ± 0.07 †       | 68.7 ± 7.1 †     |
| CIRS1KO Sham (8) | 2 wk.             | 708.6 ± 9.1     | 4.57 ± 0.32                         | 0.99 ± 0.12                         | 6.08 ± 0.15         | 4.83 ± 0.09           | 23.3 ± 2.1         | 4.0 ± 0.6          | 61.6 ± 4.4             | 19.3 ± 1.8      | 13.7 ± 1.3          | 0.67 ± 0.04         | 82.7 ± 1.7       |
| CIRS1KO TAC (12) | 2 wk.             | 722.4 ± 5.8 *   | 4.76 ± 0.27 *                       | 0.95 ± 0.14 *                       | 6.32 ± 0.09 *       | 5.13 ± 0.15 *         | 25.0 ± 1.3 *       | 4.1 ± 0.7 *        | 71.2 ± 3.3 *           | 20.8 ± 0.8 *    | 15.0 ± 0.6 *        | 0.76 ± 0.04 *       | 84.0 ± 1.9 *     |
| CIRS2KO Sham (7) | 2 wk.             | 662.3 ± 21.6    | 8.11 ± 0.65 ‡                       | 2.1 ± 0.29                          | 6.71 ± 0.13 ‡       | 5.40 ± 0.21           | 45.5 ± 4.3         | 9.7 ± 1.6          | 73.5 ± 4.5             | 35.9 ± 3.2 *‡   | 23.4 ± 1.5 *‡       | 0.91 ± 0.04 *‡      | 79.2 ± 2.4       |
| CIRS2KO TAC (9)  | 2 wk.             | 580.2 ± 43.9 *‡ | 12.44 ± 1.68 *†‡                    | 8.43 ± 1.71 *†‡                     | 7.57 ± 0.25 †‡      | 6.89 ± 0.29 *†‡       | 80.0 ± 12.1 *†‡    | 51.3 ± 11.8 *†‡    | 125.7 ± 3.9 *†‡        | 28.8 ± 1.9 †‡   | 16.3 ± 1.1 †        | 0.69 ± 0.06 *       | 43.4 ± 6.6 *†‡   |

Mice for the 2-d time point were operated at the age of 6 wk. (suture method, 27 G) and for the 2 wk. time point at 8 wk. (suture method, 27 G). Data shown are mean values ± SEM. Two-way ANOVA was performed to analyze differences after TAC surgery by genotype, followed by Holm-Šidák post-hoc analysis (# p<0.05 for TAC surgery, \$ p<0.05 for genotype, and & p<0.05 for the interaction between TAC surgery and genotype). HR, heart rate; Area;d, left ventricular endocardial area at end-diastole (short axis view); Area;s, left ventricular endocardial area at end-systole (short axis view); Majr;d, left ventricular long-axis length at end-diastole (long axis view); Majr;s, left ventricular long-axis length at end-systole (long axis view); EDV, left ventricular end-diastolic volume; ESV, left ventricular end-systolic volume; SV, stroke volume; CO, cardiac output; CI, cardiac index; EF, ejection fraction. \* p<0.05 vs. WT same surgery, † p<0.05 vs. Sham same genotype, ‡ p<0.05 vs. CIRS1KO same surgery.

**Supplemental Table 2:** Contractile function assessed by transthoracic echocardiography in WT, CIRS1KO and CIRS2KO mice (sedated mice)

| Group (n)         | Time post-surgery [wk.] | LVDd [mm]<br>\$   | LVDs [mm]<br>\$   | LVPWd [mm]<br>\$   | LVPWs [mm]<br>\$   | IVSd [mm]<br>\$ | IVSs [mm]<br>\$ | EF [%]<br>#    | FS [%]<br>#    | HR [bpm]<br># | SV [μl]<br>\$ | CO [ml/ml]<br>\$   | CI [ml/min/g]<br>#  |
|-------------------|-------------------------|-------------------|-------------------|--------------------|--------------------|-----------------|-----------------|----------------|----------------|---------------|---------------|--------------------|---------------------|
| WT Sham (6)       | 0 wk.                   | 3.75 ± 0.08       | 2.65 ± 0.10       | 0.69 ± 0.02        | 0.91 ± 0.02        | 0.79 ± 0.02     | 1.12 ± 0.04     | 64.9 ± 1.6     | 29.6 ± 1.1     | 464.9 ± 20.0  | 35.3 ± 1.1    | 16.3 ± 0.3         | 0.79 ± 0.04         |
| WT TAC (15)       | 0 wk.                   | 3.62 ± 0.10       | 2.49 ± 0.11       | 0.74 ± 0.02        | 1.00 ± 0.03        | 0.74 ± 0.01     | 1.02 ± 0.02     | 67.7 ± 1.6     | 31.7 ± 1.1     | 454.9 ± 17.4  | 34.5 ± 1.7    | 15.7 ± 0.9         | 0.77 ± 0.05         |
| CIRS1KO Sham (6)  | 0 wk.                   | 3.25 ± 0.06 *     | 2.20 ± 0.05       | 0.69 ± 0.03        | 0.94 ± 0.02        | 0.74 ± 0.02     | 1.04 ± 0.05     | 68.9 ± 1.2     | 32.3 ± 0.9     | 442.1 ± 19.6  | 26.5 ± 2.1 *  | 11.6 ± 0.8 *       | 0.84 ± 0.07         |
| CIRS1KO TAC (18)  | 0 wk.                   | 3.44 ± 0.07       | 2.41 ± 0.08       | 0.69 ± 0.01        | 0.92 ± 0.03 *      | 0.75 ± 0.02     | 1.02 ± 0.03     | 65.5 ± 1.8     | 30.3 ± 1.2     | 448.4 ± 9.9   | 28.9 ± 1.1 *  | 12.9 ± 0.5 *       | 0.81 ± 0.02         |
| CIRS2KO Sham (6)  | 0 wk.                   | 3.89 ± 0.08 ‡     | 2.70 ± 0.09       | 0.71 ± 0.03        | 0.99 ± 0.06        | 0.75 ± 0.02     | 1.07 ± 0.04     | 66.3 ± 2.5     | 30.6 ± 1.6     | 453.6 ± 31.0  | 40.3 ± 1.0 ‡  | 18.2 ± 1.0 ‡       | 0.87 ± 0.08         |
| CIRS2KO TAC (17)  | 0 wk.                   | 3.75 ± 0.10 ‡     | 2.66 ± 0.11       | 0.72 ± 0.02        | 0.97 ± 0.02        | 0.78 ± 0.02     | 1.07 ± 0.02     | 64.6 ± 1.7     | 29.6 ± 1.1     | 450.4 ± 18.8  | 34.1 ± 1.6 ‡  | 15.2 ± 0.8 ‡       | 0.74 ± 0.04         |
| Group (n)         | Time post-surgery [wk.] | LVDd [mm]<br>#,\$ | LVDs [mm]<br>#,\$ | LVPWd [mm]<br>#,\$ | LVPWs [mm]<br>#,\$ | IVSd [mm]<br>#  | IVSs [mm]<br>\$ | EF [%]<br>#    | FS [%]<br>#    | HR [bpm]<br># | SV [μl]<br>\$ | CO [ml/ml]<br>#,\$ | CI [ml/min/g]<br>#  |
| WT Sham (10)      | 2 wk.                   | 4.00 ± 0.07       | 2.86 ± 0.08       | 0.67 ± 0.02        | 0.90 ± 0.03        | 0.73 ± 0.02     | 1.04 ± 0.03     | 63.4 ± 1.6     | 28.7 ± 1.1     | 492.5 ± 15.1  | 42.0 ± 1.4    | 20.7 ± 1.0         | 0.87 ± 0.04         |
| WT TAC (12)       | 2 wk.                   | 4.01 ± 0.10       | 2.87 ± 0.10       | 0.76 ± 0.02 †      | 1.05 ± 0.03 †      | 0.78 ± 0.02     | 1.08 ± 0.04     | 63.1 ± 1.8     | 28.5 ± 1.2     | 515.2 ± 9.8   | 42.7 ± 2.4    | 22.0 ± 1.3         | 0.95 ± 0.05         |
| CIRS1KO Sham (10) | 2 wk.                   | 3.52 ± 0.07 *     | 2.48 ± 0.06 *     | 0.62 ± 0.02        | 0.85 ± 0.04        | 0.73 ± 0.02     | 1.02 ± 0.03     | 65.0 ± 1.5     | 29.6 ± 1.0     | 480.5 ± 14.7  | 31.3 ± 1.7 *  | 15.1 ± 1.0 *       | 0.90 ± 0.06         |
| CIRS1KO TAC (21)  | 2 wk.                   | 3.85 ± 0.06 †     | 2.83 ± 0.08 †     | 0.67 ± 0.02 *      | 0.91 ± 0.02 *      | 0.73 ± 0.02     | 1.02 ± 0.03     | 60.4 ± 1.8     | 26.9 ± 1.1     | 515.2 ± 12.8  | 34.9 ± 1.2 *  | 18.0 ± 0.8 *       | 0.93 ± 0.03         |
| CIRS2KO Sham (13) | 2 wk.                   | 4.01 ± 0.09 ‡     | 2.86 ± 0.09 ‡     | 0.67 ± 0.03        | 0.95 ± 0.05        | 0.72 ± 0.02     | 1.01 ± 0.03     | 63.7 ± 1.5     | 28.9 ± 1.0     | 509.1 ± 15.5  | 42.0 ± 2.0 ‡  | 21.4 ± 1.2 ‡       | 0.86 ± 0.04         |
| CIRS2KO TAC (11)  | 2 wk.                   | 4.24 ± 0.07 ‡     | 3.20 ± 0.06 *†‡   | 0.76 ± 0.02 †‡     | 0.98 ± 0.03        | 0.75 ± 0.01     | 0.99 ± 0.03     | 57.1 ± 1.4 †   | 24.7 ± 0.8 †   | 534.9 ± 9.3   | 44.5 ± 1.7 ‡  | 23.8 ± 1.0 ‡       | 0.96 ± 0.03         |
| Group (n)         | Time post-surgery [wk.] | LVDd [mm]<br>#,\$ | LVDs [mm]<br>#,\$ | LVPWd [mm]<br>#,\$ | LVPWs [mm]<br>#    | IVSd [mm]<br>#  | IVSs [mm]<br>\$ | EF [%]<br>#,\$ | FS [%]<br>#,\$ | HR [bpm]<br># | SV [μl]<br>\$ | CO [ml/ml]<br>\$   | CI [ml/min/g]<br>#& |
| WT Sham (10)      | 4 wk.                   | 4.00 ± 0.07       | 2.86 ± 0.09       | 0.68 ± 0.02        | 0.94 ± 0.03        | 0.72 ± 0.02     | 1.01 ± 0.04     | 63.5 ± 1.8     | 28.72 ± 1.3    | 512.3 ± 10.0  | 41.8 ± 1.4    | 21.4 ± 0.9         | 0.83 ± 0.03         |
| WT TAC (12)       | 4 wk.                   | 4.31 ± 0.14       | 3.25 ± 0.16       | 0.76 ± 0.02 †      | 1.02 ± 0.03        | 0.77 ± 0.02     | 1.02 ± 0.03     | 57.3 ± 2.6     | 25.09 ± 1.7    | 511.1 ± 15.0  | 44.5 ± 2.7    | 22.6 ± 1.3         | 0.93 ± 0.05         |
| CIRS1KO Sham (10) | 4 wk.                   | 3.58 ± 0.05 *     | 2.48 ± 0.08       | 0.65 ± 0.01        | 0.91 ± 0.03        | 0.76 ± 0.02     | 1.07 ± 0.04     | 66.4 ± 2.3     | 30.85 ± 1.6    | 522.3 ± 21.4  | 34.1 ± 1.3 *  | 17.8 ± 0.9         | 1.01 ± 0.07 *       |
| CIRS1KO TAC (21)  | 4 wk.                   | 3.84 ± 0.10 *     | 2.75 ± 0.13 *     | 0.69 ± 0.02 *      | 0.95 ± 0.03        | 0.81 ± 0.02     | 1.14 ± 0.04 *   | 63.4 ± 2.6     | 29.14 ± 1.6    | 528.6 ± 15.9  | 35.1 ± 0.9 *  | 18.6 ± 0.7 *       | 0.92 ± 0.03         |
| CIRS2KO Sham (13) | 4 wk.                   | 4.13 ± 0.08 ‡     | 2.94 ± 0.10 ‡     | 0.67 ± 0.02        | 0.95 ± 0.03        | 0.72 ± 0.02     | 1.03 ± 0.03     | 63.7 ± 1.9     | 28.94 ± 1.3    | 511.4 ± 14.5  | 44.6 ± 1.5 ‡  | 22.8 ± 0.9 ‡       | 0.84 ± 0.03 ‡       |
| CIRS2KO TAC (11)  | 4 wk.                   | 4.62 ± 0.07 *†‡   | 3.57 ± 0.07 †‡    | 0.75 ± 0.02 †‡     | 1.03 ± 0.03        | 0.77 ± 0.01     | 1.01 ± 0.03 ‡   | 53.8 ± 1.2†‡   | 22.72 ± 0.6 †‡ | 515.9 ± 17.1  | 48.2 ± 1.9 ‡  | 24.9 ± 1.4 ‡       | 0.97 ± 0.05         |

Mice were operated at the age of 6 wk. (clip method, 30 G). Data shown are mean values ± SEM. Two-way ANOVA was performed to analyze differences after TAC surgery by genotype, followed by Holm-Šidák post-hoc analysis (# p<0.05 for TAC surgery, \$ p<0.05 for genotype, and & p<0.05 for the interaction between TAC surgery and genotype). LVDd, left ventricular cavity diameter at diastole; LVDs, left ventricular cavity diameter at systole; LVPWd, left ventricular posterior wall thickness at diastole; LVPWs, left ventricular posterior wall thickness at systole; IVSd, interventricular septum diameter at diastole; IVSs, interventricular septum diameter at systole; EF, Ejection fraction; FS, Fractional shortening; HR, heart rate; bpm, beats per minute; SV, stroke volume; CO, cardiac output; CI, cardiac index. \* p<0.05 vs. WT same surgery, † p<0.05 vs. Sham same genotype, ‡ p<0.05 vs. CIRS1KO same surgery.

**Supplemental Table 3:** Characteristics of WT, CIRS1KO and CIRS2KO mice post-surgery

| Group (n)         | Time post-surgery | BW [g]<br>\$  | HW [mg]<br>#,\$,& | WLW [mg]<br>#,\$   | HW/TL [mg/mm]<br>#,\$,& | WLW / TL [mg/mm]<br>#,\$   |
|-------------------|-------------------|---------------|-------------------|--------------------|-------------------------|----------------------------|
| WT Sham (6)       | 3 d               | 22.4 ± 0.6    | 114.0 ± 3.5       | 134.8 ± 5.9        | 6.83 ± 0.18             | 8.07 ± 0.31                |
| WT TAC (8)        | 3 d               | 19.8 ± 0.8    | 160.5 ± 8.6 †     | 126.7 ± 7.4        | 9.86 ± 0.53 †           | 7.76 ± 0.41                |
| CIRS1KO Sham (7)  | 3 d               | 15.3 ± 1.1 *  | 82.0 ± 7.9 *      | 105.8 ± 9.8        | 5.30 ± 0.48 *           | 6.87 ± 0.60                |
| CIRS1KO TAC (6)   | 3 d               | 14.3 ± 0.9 *  | 91.3 ± 3.7 *      | 126.6 ± 9.7        | 5.91 ± 0.19 *           | 8.15 ± 0.49                |
| CIRS2KO Sham (6)  | 3 d               | 21.5 ± 0.4 ‡  | 120.9 ± 2.8 ‡     | 135.7 ± 6.2        | 7.38 ± 0.17 ‡           | 8.28 ± 0.36                |
| CIRS2KO TAC (7)   | 3 d               | 22.5 ± 0.5 *‡ | 163.2 ± 2.7 †‡    | 171.7 ± 11.2 *†‡   | 9.66 ± 0.18 †‡          | 10.16 ± 0.66 *†‡           |
| Group (n)         | Time post-surgery | BW [g]<br>\$  | HW [mg]<br>#,\$,& | WLW [mg]<br>#,\$,& | HW/TL [mg/mm]<br>#,\$,& | WLW / TL [mg/mm]<br>#,\$,& |
| WT Sham (9)       | 2 wk.             | 24.3 ± 0.6    | 106.4 ± 3.2       | 143.2 ± 4.4        | 6.31 ± 0.19             | 8.49 ± 0.25                |
| WT TAC (10)       | 2 wk.             | 23.3 ± 0.9    | 167.6 ± 7.6 †     | 222.8 ± 34.1 †     | 9.98 ± 0.46 †           | 13.26 ± 2.04 †             |
| CIRS1KO Sham (8)  | 2 wk.             | 20.4 ± 0.8 *  | 101.3 ± 3.5       | 141.6 ± 10.6       | 6.31 ± 0.21             | 8.82 ± 0.66                |
| CIRS1KO TAC (12)  | 2 wk.             | 20.1 ± 0.6 *  | 132.1 ± 4.2 *†    | 125.9 ± 4.3 *      | 8.31 ± 0.21 *†          | 7.94 ± 0.28 *              |
| CIRS2KO Sham (7)  | 2 wk.             | 25.8 ± 1.1 ‡  | 116.5 ± 4.6       | 149.0 ± 6.4        | 6.79 ± 0.23             | 8.69 ± 0.37                |
| CIRS2KO TAC (9)   | 2 wk.             | 24.1 ± 1.2 ‡  | 190.9 ± 6.1 *†‡   | 363.8 ± 42.0 *†‡   | 11.19 ± 0.36 *†‡        | 21.36 ± 2.47 *†‡           |
| Group (n)         | Time post-surgery | BW [g]<br>\$  | HW [mg]<br>#,\$,& | WLW [mg]<br>#,\$,& | HW/TL [mg/mm]<br>#,\$,& | WLW / TL [mg/mm]<br>#,\$,& |
| WT Sham (10)      | 4 wk.             | 25.7 ± 0.6    | 112.9 ± 1.3       | 152.8 ± 4.5        | 6.49 ± 0.10             | 8.77 ± 0.22                |
| WT TAC (10)       | 4 wk.             | 25.5 ± 0.5    | 170.7 ± 10.3 †    | 165.9 ± 7.6        | 10.02 ± 0.62 †          | 9.73 ± 0.45                |
| CIRS1KO Sham (10) | 4 wk.             | 18.3 ± 0.9 *  | 88.4 ± 3.6 *      | 121.3 ± 5.1 *      | 5.55 ± 0.17             | 7.61 ± 0.26                |
| CIRS1KO TAC (10)  | 4 wk.             | 20.4 ± 0.5 *  | 106.9 ± 3.8 *†    | 129.9 ± 4.7 *      | 6.58 ± 0.22 *†          | 7.99 ± 0.24 *              |
| CIRS2KO Sham (10) | 4 wk.             | 26.2 ± 0.6 ‡  | 119.7 ± 2.7 ‡     | 152.1 ± 2.7 ‡      | 6.90 ± 0.15 ‡           | 8.77 ± 0.16                |
| CIRS2KO TAC (10)  | 4 wk.             | 25.5 ± 0.6 ‡  | 198.3 ± 9.4 *†‡   | 208.3 ± 16.9 *†‡   | 11.55 ± 0.54 *†‡        | 12.14 ± 1.00 *†‡           |

Mice for the 3-d time point were operated at the age of 6 wk. (suture method, 27 G), for the 2 wk. time point at 8 wk. (suture method, 27 G), and for the 4 wk. time point at 6 wk. (clip method, 30 G). Data shown are mean values ± SEM. Two-way ANOVA was performed to analyze differences after TAC surgery by genotype, followed by Holm-Šidák post-hoc analysis (# p<0.05 for TAC surgery, \$ p<0.05 for genotype, and & p<0.05 for the interaction between TAC surgery and genotype). BW, body weight; HW, heart weight; WLW, wet lung weight; TL, tibia length. \* p<0.05 vs. WT same surgery, † p<0.05 vs. Sham same genotype, ‡ p<0.05 vs. CIRS1KO same surgery.

**Supplemental Table 4:** Invasive measurement of left ventricular pressures in WT, CIRS1KO and CIRS2KO mice four weeks post-surgery

| Group (n)         | LVSP [mmHg]<br>#,\$ | LVMP [mmHg]<br>#,& | LV Dev P [mmHg]<br>#,\$ | Max dP/dt [mmHg/s]<br>#,& | Min dP/dt [mmHg/s]<br>#,&         | Heart Rate [bpm] |
|-------------------|---------------------|--------------------|-------------------------|---------------------------|-----------------------------------|------------------|
| WT Sham (10)      | 109.72 ± 4.23       | 3.88 ± 2.22        | 105.83 ± 2.98           | 8239 ± 604                | -8639 ± 648                       | 517 ± 32         |
| WT TAC (10)       | 160.82 ± 2.19 †     | 7.75 ± 1.02        | 153.07 ± 2.73 †         | 6651 ± 359 †              | -7244 ± 213<br>p=0.052 vs. WT TAC | 508 ± 11         |
| CIRS1KO Sham (9)  | 101.53 ± 3.00       | 6.56 ± 0.79        | 94.97 ± 2.86            | 6654 ± 325 *              | -7408 ± 414                       | 530 ± 17         |
| CIRS1KO TAC (14)  | 135.43 ± 5.28 *†    | 6.17 ± 0.74        | 129.25 ± 5.18 *†        | 7112 ± 302                | -8331 ± 359                       | 523 ± 18         |
| CIRS2KO Sham (11) | 107.03 ± 4.17       | 2.52 ± 0.70        | 104.51 ± 4.28           | 8180 ± 506 ‡              | -8209 ± 419                       | 497 ± 17         |
| CIRS2KO TAC (10)  | 149.59 ± 4.46 †‡    | 11.23 ± 1.36 †‡    | 138.35 ± 5.45 *†        | 5050 ± 309 *†‡            | -6140 ± 356 †‡                    | 514 ± 17         |

Mice were operated at the age of 6 wk. (clip method, 30 G). Data shown are mean values ± SEM. Two-way ANOVA was performed to analyze differences four weeks after TAC surgery by genotype, followed by Holm-Šidák post-hoc analysis (# p<0.05 for TAC surgery, \$ p<0.05 for genotype, and & p<0.05 for the interaction between TAC surgery and genotype). LVSP, left ventricular systolic pressure; LVMP, left ventricular minimum pressure; LV Dev P, left ventricular developed pressure; Max dP/dt, maximal rate of increase in left ventricular pressure; Min dP/dt, maximal rate of decrease in left ventricular pressure; bpm, beats per minute. \* p<0.05 vs. WT same surgery, † p<0.05 vs. Sham same genotype, ‡ p<0.05 vs. CIRS1KO same surgery.

**Supplemental Table 5:** Characteristics of CIRS2KO x Akt1<sup>het</sup> cross mice four weeks post-surgery

| Group                              | BW pre-surgery [g]<br>\$ | BW [g]<br>\$,& | HW [mg]<br>#,\$,& | WLW [mg]<br>#,\$ | HW/TL [mg/mm]<br>#,\$,& | WLW / TL [mg/mm]<br>#,\$ |
|------------------------------------|--------------------------|----------------|-------------------|------------------|-------------------------|--------------------------|
| WT Sham                            | 21.8 ± 0.7               | 25.0 ± 0.8     | 119.9 ± 4.2       | 170.9 ± 5.32     | 7.03 ± 0.22             | 10.02 ± 0.28             |
| WT TAC                             | 22.6 ± 0.3               | 25.3 ± 0.5     | 197.1 ± 14.7 *    | 259.2 ± 44.08 *  | 11.56 ± 0.87 *          | 15.22 ± 2.61 *           |
| CIRS2KO Sham                       | 23.9 ± 0.6 ‡             | 28.2 ± 1.0 ‡   | 126.0 ± 3.8       | 192.1 ± 4.65     | 7.16 ± 0.19             | 10.92 ± 0.23             |
| CIRS2KO TAC                        | 23.1 ± 0.4               | 26.7 ± 0.7     | 210.9 ± 8.6 *     | 301.5 ± 35.89 *  | 12.04 ± 0.52 *          | 17.22 ± 2.08 *           |
| Akt1 <sup>het</sup> Sham           | 21.7 ± 0.6               | 25.0 ± 0.5     | 112.6 ± 2.4       | 169.3 ± 4.76     | 6.70 ± 0.14             | 10.07 ± 0.27             |
| Akt1 <sup>het</sup> TAC            | 22.7 ± 0.5               | 25.5 ± 0.6     | 159.9 ± 8.1*†     | 201.8 ± 16.48    | 9.34 ± 0.46 *†          | 11.78 ± 0.95             |
| CIRS2KO x Akt1 <sup>het</sup> Sham | 22.2 ± 0.5               | 25.8 ± 0.8     | 117.5 ± 3.6       | 175.4 ± 3.43     | 6.81 ± 0.17             | 10.17 ± 0.15             |
| CIRS2KO x Akt1 <sup>het</sup> TAC  | 23.6 ± 0.4               | 28.5 ± 0.4 *‡  | 167.2 ± 5.1 *†    | 189.7 ± 3.94 †   | 9.54 ± 0.29 *†          | 10.82 ± 0.21 †           |

Mice were operated at the age of 6 wk. (clip method, 30 G). Data shown are mean values ± SEM, n=10. Two-way ANOVA was performed to analyze differences four weeks after TAC surgery by genotype, followed by Holm-Šídák post-hoc analysis (# p<0.05 for TAC surgery, \$ p<0.05 for genotype, and & p<0.05 for the interaction between TAC surgery and genotype). BW, body weight; HW, heart weight; WLW, wet lung weight; TL, tibia length. \* p<0.05 vs. Sham same genotype, † p<0.05 vs. Akt1 WT same surgery, ‡ p<0.05 vs. IRS2 WT same surgery.

**Supplemental Table 6:** Contractile function assessed by transthoracic echocardiography in CIRS2KO x Akt1<sup>het</sup> cross mice four weeks post-surgery (sedated mice)

| Group                              | LVDd [mm]<br>#,\$ | LVDs [mm]<br>#,\$,& | LVPWd [mm]<br># | LVPWs [mm]<br># | IVSd [mm]<br># | IVSs [mm]<br>#,& | EF [%]<br>#,& | FS [%]<br>#,\$,& | HR [bpm]<br># |
|------------------------------------|-------------------|---------------------|-----------------|-----------------|----------------|------------------|---------------|------------------|---------------|
| WT Sham                            | 3.96 ± 0.07       | 2.58 ± 0.15         | 0.80 ± 0.10     | 1.15 ± 0.11     | 0.76 ± 0.05    | 1.00 ± 0.06      | 49.5 ± 3.1    | 33.1 ± 2.3       | 425 ± 17      |
| WT TAC                             | 4.32 ± 0.12 *     | 3.39 ± 0.10 *       | 1.02 ± 0.08 *   | 1.34 ± 0.08     | 0.91 ± 0.07 *  | 0.99 ± 0.07      | 38.3 ± 3.3 *  | 20.7 ± 1.9 *     | 446 ± 21      |
| CIRS2KO Sham                       | 4.02 ± 0.08       | 2.67 ± 0.09         | 0.72 ± 0.06     | 1.17 ± 0.09     | 0.65 ± 0.04    | 0.85 ± 0.04      | 57.4 ± 3.0    | 32.9 ± 1.3       | 419 ± 16      |
| CIRS2KO TAC                        | 4.32 ± 0.11       | 3.61 ± 0.15 *       | 1.08 ± 0.08 *   | 1.28 ± 0.07     | 0.85 ± 0.05 *  | 0.96 ± 0.05      | 30.1 ± 3.6 *  | 15.9 ± 2.1 *     | 467 ± 10      |
| Akt1 <sup>het</sup> Sham           | 3.93 ± 0.07       | 2.70 ± 0.12         | 0.75 ± 0.04     | 1.03 ± 0.09     | 0.75 ± 0.03    | 0.89 ± 0.05      | 49.6 ± 3.3    | 30.8 ± 2.6       | 410 ± 22      |
| Akt1 <sup>het</sup> TAC            | 3.87 ± 0.11 †     | 2.74 ± 0.15 †       | 0.99 ± 0.08 *   | 1.39 ± 0.08 *   | 0.86 ± 0.03    | 1.15 ± 0.03 *    | 44.5 ± 2.9    | 29.5 ± 2.2 †     | 423 ± 15      |
| CIRS2KO x Akt1 <sup>het</sup> Sham | 3.94 ± 0.09       | 2.61 ± 0.11         | 0.74 ± 0.03     | 1.18 ± 0.04     | 0.66 ± 0.04    | 0.81 ± 0.04      | 54.7 ± 2.6    | 33.9 ± 1.4       | 427 ± 11      |
| CIRS2KO x Akt1 <sup>het</sup> TAC  | 4.06 ± 0.06       | 2.90 ± 0.11 †       | 0.99 ± 0.05 *   | 1.35 ± 0.06     | 0.84 ± 0.05 *  | 1.07 ± 0.05 *    | 42.6 ± 2.3 *† | 28.0 ± 1.9 †     | 447 ± 15      |

Mice were operated at the age of 6 wk. (clip method, 30 G). Data shown are mean values ± SEM, n=10. Two-way ANOVA was performed to analyze differences four weeks after TAC surgery by genotype, followed by Holm-Šidák post-hoc analysis (# p<0.05 for TAC surgery, \$ p<0.05 for genotype, and & p<0.05 for the interaction between TAC surgery and genotype). LVDd, left ventricular cavity diameter at diastole; LVDs, left ventricular cavity diameter at systole; LVPWd, left ventricular posterior wall thickness at diastole; LVPWs, left ventricular posterior wall thickness at systole; IVSd, interventricular septum diameter at diastole; IVSs, interventricular septum diameter at systole; EF, Ejection fraction; FS, Fractional shortening; HR, heart rate; bpm, beats per minute. \* p<0.05 vs. Sham same genotype, † p<0.05 vs. Akt1 WT same surgery.

**Supplemental Table 7:** Invasive measurement of left ventricular pressures in CIRS2KO x Akt1<sup>het</sup> cross mice four weeks post-surgery

| Group                              | LVSP [mmHg]<br>#,\$ | LVMP [mmHg]<br># | LV Dev P [mmHg]<br>#,\$ | Max dP/dt [mmHg/s]<br>#,\$ | Min dP/dt [mmHg/s]<br>#,\$,& | Heart Rate<br>[bpm] |
|------------------------------------|---------------------|------------------|-------------------------|----------------------------|------------------------------|---------------------|
| WT Sham                            | 100.00 ± 2.77       | 0.18 ± 0.88      | 99.82 ± 2.56            | 8985 ± 517                 | -9059 ± 385                  | 495 ± 15            |
| WT TAC                             | 149.34 ± 5.53 *     | 7.00 ± 2.45 *    | 142.33 ± 6.51 *         | 6080 ± 469 *               | -7156 ± 487 *                | 504 ± 21            |
| CIRS2KO Sham                       | 101.65 ± 1.69       | 1.01 ± 1.16      | 100.65 ± 1.32           | 8102 ± 323                 | -8656 ± 587                  | 503 ± 12            |
| CIRS2KO TAC                        | 144.85 ± 6.71 *     | 9.27 ± 2.01 *    | 135.57 ± 8.47 *         | 5895 ± 560 *               | -6669 ± 484 *                | 526 ± 22            |
| Akt1 <sup>het</sup> Sham           | 102.26 ± 2.42       | 1.27 ± 0.76      | 101.00 ± 2.37           | 8401 ± 410                 | -8375 ± 466                  | 494 ± 15            |
| Akt1 <sup>het</sup> TAC            | 147.52 ± 3.40 *     | 4.02 ± 0.84      | 143.50 ± 3.43 *         | 6861 ± 214 *               | -7765 ± 333                  | 504 ± 12            |
| CIRS2KO x Akt1 <sup>het</sup> Sham | 105.68 ± 3.27       | 0.93 ± 0.71      | 104.75 ± 2.83           | 9370 ± 212                 | -9132 ± 308                  | 515 ± 10            |
| CIRS2KO x Akt1 <sup>het</sup> TAC  | 164.23 ± 4.63 *†‡   | 4.67 ± 1.27      | 159.56 ± 4.59 *†        | 7975 ± 557 *†              | -9738 ± 703 †‡               | 509 ± 19            |

Mice were operated at the age of 6 wk. (clip method, 30 G). Data shown are mean values ± SEM, n=10. Two-way ANOVA was performed to analyze differences four weeks after TAC surgery by genotype, followed by Holm-Šídák post-hoc analysis (# p<0.05 for TAC surgery, \$ p<0.05 for genotype, and & p<0.05 for the interaction between TAC surgery and genotype). LVSP, left ventricular systolic pressure; LVMP, left ventricular minimum pressure; LV Dev P, left ventricular developed pressure; Max dP/dt, maximal rate of increase in left ventricular pressure; Min dP/dt, maximal rate of decrease in left ventricular pressure; bpm, beats per minute. \* p<0.05 vs. Sham same genotype, † p<0.05 vs. Akt1 WT same surgery, ‡ p<0.05 vs. IRS2 WT same surgery.

**Supplemental Table 8:** Patient characteristics

| <b>Parameter</b>                      | <b>Non-Failing</b> | <b>Failing</b> |
|---------------------------------------|--------------------|----------------|
| Number of patients [n]                | 7                  | 17             |
| Male / Female [n]                     | 5/2                | 15/2           |
| Age [years]                           | 42.3 ± 2.7         | 61.6 ± 2.8 *   |
| Body mass index [kg/m <sup>2</sup> ]  | 25.7 ± 1.2         | 28.9 ± 0.9     |
| Body surface area [m <sup>2</sup> ]   | 1.9 ± 0.1          | 2.0 ± 0.1      |
| Ischemic heart failure                |                    | 41.2 %         |
| NYHA class                            |                    | 3.9 ± 0.1      |
| Ejection fraction [%]                 | 63.2 ± 3.3         | 19.1 ± 1.8 *   |
| Cardiac index [L/min/m <sup>2</sup> ] | 4.3 ± 0.3          | 1.7 ± 0.1 *    |
| LV mass [g]                           |                    | 310.7 ± 27.1   |
| LV mass index [g/m <sup>2</sup> ]     |                    | 156.7 ± 13.0   |
| LV end-diastolic diameter [mm]        | 43.9 ± 1.9         | 68.7 ± 2.3 *   |
| Type 1 Diabetes mellitus [%]          | 0                  | 0              |
| Type 2 Diabetes mellitus [%]          | 0                  | 52.9%          |
| noninsulin-dependent (NIDDM)          | 0                  | 35.3%          |
| insulin-dependent (IDDM)              | 0                  | 17.6%          |

Data shown are mean values ± SEM, \* p<0.05 vs. non-failing controls. LV mass was calculated using the Devereux and Reichek "cube" formula (15). No information is available for LV mass (reference range [g]: 88-224 for men and 67-162 for women) and for LV mass index (reference range [g/m<sup>2</sup>]: 49-115 for men and 43-95 for women) for non-failing controls (16). Note that values for LV mass and LV mass index are available for only a total of 13 patients with terminal heart failure. For all other parameters, values are presented based on the information obtained from all 17 patients with end-stage heart failure.



**Supplemental Table 9:** Clustered heat map depicting the change in peptide phosphorylation four weeks post-surgery

| ID                       | Sequence           | Uniprot ID | Tyr             | Ser                       | Thr                  | WT   |     | CIRS1KO |     | CIRS2KO |     |
|--------------------------|--------------------|------------|-----------------|---------------------------|----------------------|------|-----|---------|-----|---------|-----|
|                          |                    |            |                 |                           |                      | Sham | TAC | Sham    | TAC | Sham    | TAC |
| KCC2G 278 289            | VASMMHROETVE       | Q13555     | Na              | [280]                     | [287]                |      |     |         |     |         |     |
| BAD 112 124              | RELRRMSDEFVDS      | Q92934     | Na              | [118, 124]                | ]                    |      |     |         |     |         |     |
| pVASP 150 164            | EHIERRV(pS)NAGGPPA | P50552     | Na              | [157]                     | ]                    |      |     |         |     |         |     |
| pTY3H 64 78              | RFIGRRQ(pS)LIEDARK | P07101     | Na              | [71]                      | ]                    |      |     |         |     |         |     |
| ESR1 160 172             | GGRERLASTNDKG      | P03372     | Na              | [167]                     | [168]                |      |     |         |     |         |     |
| ADDB 696 708             | GSPSKSPSKKKKK      | P35612     | Na              | [697, 699, 701, 703]      | ]                    |      |     |         |     |         |     |
| AKT1 301 313             | KDGATMKTFCGTP      | P31749     | Na              | ]                         | [305, 308, 312]      |      |     |         |     |         |     |
| ELK1 356 368             | LLPHTLTPVLLT       | P19419     | Na              | ]                         | [359, 361, 363, 368] |      |     |         |     |         |     |
| P53 308 323              | LPNNTSSSPQPKKKPL   | P04637     | Na              | [313, 314, 315]           | [312]                |      |     |         |     |         |     |
| AMPE 5 17                | EREGSKRYCIQTK      | Q07075     | [12]            | Na                        | Na                   |      |     |         |     |         |     |
| VTNC 390 402             | NQNSRRPSRATWL      | P04004     | Na              | [393, 397]                | [400]                |      |     |         |     |         |     |
| ART 025 CXGLRRWSLGLRRWSL | GLRRWSLGLRRWSL     | Na         | Na              | Na                        | Na                   |      |     |         |     |         |     |
| CREB1 126 138            | ELSRRPSYRKIL       | P16220     | Na              | [129, 133]                | ]                    |      |     |         |     |         |     |
| SCN7A 898 910            | KNGCRRGSSSLGOI     | Q01118     | Na              | [905, 906]                | ]                    |      |     |         |     |         |     |
| RS6 228 240              | IAKRRRLSSLRAS      | P62753     | Na              | [235, 236, 240]           | ]                    |      |     |         |     |         |     |
| RYR1 4317 4329           | VRRLRLTAREAA       | P21817     | Na              | ]                         | [4324]               |      |     |         |     |         |     |
| CSF1R 701 713            | NIHLEKKYVRDS       | P07333     | Na              | [713]                     | ]                    |      |     |         |     |         |     |
| MYPC3 268 280            | LSAFRRSLAGGG       | Q14896     | Na              | [269, 275]                | [274]                |      |     |         |     |         |     |
| GRIK2 708 720            | FMSSRRQSVLVKS      | Q13002     | Na              | [710, 711, 715, 720]      | ]                    |      |     |         |     |         |     |
| NCF1 321 333             | QDAYRRNSVRFLO      | P14598     | Na              | [328]                     | ]                    |      |     |         |     |         |     |
| KCNA6 504 516            | ANRRRRPSYPTP       | P17658     | Na              | [511]                     | [515]                |      |     |         |     |         |     |
| F263 454 466             | NPLMRRNSVTPLA      | Q16875     | Na              | [461]                     | [463]                |      |     |         |     |         |     |
| TOP2A 1463 1475          | RRKRKPSTDDSD       | P11388     | Na              | [1469, 1471, 1474]        | [1470]               |      |     |         |     |         |     |
| KAP3 107 119             | NRFTRRASVCAEA      | P31323     | Na              | [114]                     | [110]                |      |     |         |     |         |     |
| KAP2 92 104              | SRFNRRVSCAET       | P13861     | Na              | [92, 99]                  | [104]                |      |     |         |     |         |     |
| NCF1 296 308             | RGAPPRRSSIRNA      | P14598     | Na              | [303, 304]                | ]                    |      |     |         |     |         |     |
| CFTR 761 773             | LQARRRQSVLNL       | P13569     | Na              | [768]                     | ]                    |      |     |         |     |         |     |
| E1A ADE05 212 224        | AILRRPTSPVSRE      | P03255     | Na              | [219, 222]                | [218]                |      |     |         |     |         |     |
| CDN1A 139 151            | GRKRQTSMTDFY       | P38936     | Na              | [146]                     | [145, 148]           |      |     |         |     |         |     |
| ANXA1 209 221            | AGERRKGTVDNVF      | P04083     | Na              | ]                         | [216]                |      |     |         |     |         |     |
| PTN12 32 44              | FMRLRLSLTKYRT      | Q05209     | Na              | [39]                      | [40, 44]             |      |     |         |     |         |     |
| GBRB2 427 439            | SRLRRRASOLKIT      | P47870     | Na              | [427, 434]                | [439]                |      |     |         |     |         |     |
| ERF 519 531              | GEAGPLTPRRVS       | P50548     | Na              | [531]                     | [526]                |      |     |         |     |         |     |
| KIF2C 105 118 S106G      | EGLRSRSTRMSTVS     | Q99661     | Na              | [109, 111, 115, 118]      | [112, 116]           |      |     |         |     |         |     |
| GSY2 1 13                | MLRGRSLSVTSLG      | P54840     | Na              | [6, 8, 11]                | [10]                 |      |     |         |     |         |     |
| BAD 93 105               | FRGRSRAPPNLW       | Q92934     | Na              | [97, 99]                  | ]                    |      |     |         |     |         |     |
| K6PL 766 778             | LEHVTRRLTSMOK      | P17858     | Na              | [775]                     | [770, 773]           |      |     |         |     |         |     |
| GPR6 349 361             | QSKVPFRSRSPSE      | P46095     | Na              | [350, 356, 358, 360]      | ]                    |      |     |         |     |         |     |
| FRAP 2443 2455           | RTRTDSYSAGQSV      | P42345     | Na              | [2448, 2450, 2454]        | [2444, 2446]         |      |     |         |     |         |     |
| NOS3 1171 1183           | SRIRTSQSFLOER      | P29474     | Na              | [1171, 1177, 1179]        | [1175]               |      |     |         |     |         |     |
| RB 242 254               | AVIPINGSRPTPR      | P06400     | Na              | [249]                     | [252]                |      |     |         |     |         |     |
| NMDZ1 890 902            | SFKRRRSSKDTST      | Q05586     | Na              | [890, 896, 897, 901]      | [900, 902]           |      |     |         |     |         |     |
| PLEK 106 118             | GQKFAKSTRRSI       | P08567     | Na              | [113, 117]                | [114]                |      |     |         |     |         |     |
| STK6 283 295             | SSRRTLLCGTLDY      | Q14965     | Na              | [283, 284]                | [287, 288, 292]      |      |     |         |     |         |     |
| NFKB1 330 342            | FVQLRRKSDLETS      | P19838     | Na              | [337, 342]                | [341]                |      |     |         |     |         |     |
| QSHB 109 121             | QCALCRRSTIDCG      | P01233     | Na              | [116]                     | [117, 118]           |      |     |         |     |         |     |
| RAF1 253 265             | QQRSTSTPNVHM       | P04049     | Na              | [257, 259]                | [258, 260]           |      |     |         |     |         |     |
| PPR1A 28 40              | QIRRRPTPATLV       | Q13522     | Na              | ]                         | [35, 38]             |      |     |         |     |         |     |
| ANDR 785 797             | VRMRHLSQEFGLW      | P10275     | Na              | [791]                     | ]                    |      |     |         |     |         |     |
| NTRK3 824 836            | LHALGKATPIYLD      | Q16288     | Na              | ]                         | [831]                |      |     |         |     |         |     |
| BCKD 45 57               | ERSKTVTSFYNQS      | Q14874     | Na              | [47, 52, 57]              | [49, 51]             |      |     |         |     |         |     |
| PDE5A 95 107             | GTPTRKISASEFD      | Q07674     | Na              | [102, 104]                | [96, 98]             |      |     |         |     |         |     |
| NCF1 313 325             | QRSRKLSQDAYR       | P14598     | [324]           | Na                        | Na                   |      |     |         |     |         |     |
| ART 003 EAI(pY)AAPFAKKXC | EAI(pY)AAPFAKKK    | Na         | Na              | Na                        | Na                   |      |     |         |     |         |     |
| RAF1 332 344             | PRGQRDSYYWEI       | P04049     | [340, 341]      | Na                        | Na                   |      |     |         |     |         |     |
| ART 004 EAIYAAPFAKKXC    | EAIYAAPFAKKK       | Na         | Na              | Na                        | Na                   |      |     |         |     |         |     |
| TYRO3 679 691            | KIYSGDYRQGCA       | Q06418     | [681, 685, 686] | Na                        | Na                   |      |     |         |     |         |     |
| PDPK1 369 381            | DEDCYGNYNLLS       | Q15530     | [373, 376]      | Na                        | Na                   |      |     |         |     |         |     |
| NTRK2 696 708            | GMSRDVYSTDYR       | Q16620     | [702, 706, 707] | Na                        | Na                   |      |     |         |     |         |     |
| DCX 109 121              | GIVYAVSSDRFRS      | Q43602     | [112]           | Na                        | Na                   |      |     |         |     |         |     |
| RBL2 655 667             | GLGRSITSPITLY      | Q08999     | Na              | [659, 662]                | [661, 664, 665]      |      |     |         |     |         |     |
| MBP 222 234              | HFFKNIVTPRTPP      | P02686     | Na              | ]                         | [229, 232]           |      |     |         |     |         |     |
| NR4A1 344 356            | GRRGRLPSPKPO       | P22736     | Na              | [351]                     | ]                    |      |     |         |     |         |     |
| RAP1B 172 184            | PGKARKKSSCQLL      | P61224     | Na              | [179, 180]                | ]                    |      |     |         |     |         |     |
| BAD 69 81                | IRSRHSSYPAGTE      | Q92934     | Na              | [71, 74, 75]              | [80]                 |      |     |         |     |         |     |
| KCNA2 442 454            | PDLKKRSASTIS       | P16389     | Na              | [447, 449, 451, 454]      | [452]                |      |     |         |     |         |     |
| KPCB 19 31 A25S          | RFARKGSLROKNV      | P05771     | Na              | [25]                      | ]                    |      |     |         |     |         |     |
| H2B1B 27 40              | GKKRKRKRSEYSI      | P33778     | Na              | [33, 37, 39]              | ]                    |      |     |         |     |         |     |
| MP2K1 287 299            | PPRPRTPORPLSS      | Q02750     | Na              | [298, 299]                | [292]                |      |     |         |     |         |     |
| ACM5 498 510             | CNRTFRKTFKMLL      | P08912     | Na              | ]                         | [501, 505]           |      |     |         |     |         |     |
| MIPI1 172 184            | FTQRQNSAPARML      | P30304     | Na              | [178]                     | [173]                |      |     |         |     |         |     |
| ACM4 456 468             | CNATFKKTFRHLL      | P08173     | Na              | ]                         | [459, 463]           |      |     |         |     |         |     |
| ACM1 444 456             | KIPKRPQSVHRT       | P11229     | Na              | [451]                     | [455]                |      |     |         |     |         |     |
| CENPA 1 14               | MGPRRRSRKPEAPR     | P49450     | Na              | [7]                       | ]                    |      |     |         |     |         |     |
| ACM5 494 506             | CYALCNRTFRKTF      | P08912     | Na              | ]                         | [501, 505]           |      |     |         |     |         |     |
| PRKDC 2618 2630          | TRTQEGSLSARWP      | P78527     | Na              | [2624, 2626]              | [2618, 2620]         |      |     |         |     |         |     |
| FOXO3 25 37              | QSRPRSCWPLQR       | Q43524     | Na              | [26, 30]                  | [32]                 |      |     |         |     |         |     |
| VASP 271 283             | LARRRKATQVGEK      | P50552     | Na              | ]                         | [278]                |      |     |         |     |         |     |
| TEC 512 524              | RYFLDDQYSSSG       | P42680     | [513, 519]      | Na                        | Na                   |      |     |         |     |         |     |
| PGFRB 709 721            | RPPSAELYSNALP      | P09619     | [716]           | Na                        | Na                   |      |     |         |     |         |     |
| K2C6B 53 65              | GAGGFSRSLYGLG      | P04259     | [62]            | Na                        | Na                   |      |     |         |     |         |     |
| TAU 524 536              | GSRRTPSLPTPP       | P10636     | Na              | [525, 527, 531]           | [529, 534]           |      |     |         |     |         |     |
| GSUB 61 73               | KKPRRKDTPALHI      | Q96001     | Na              | ]                         | [68]                 |      |     |         |     |         |     |
| KCNB1 489 501            | KWTKRTLSETSSS      | Q14721     | Na              | [496, 499, 500, 501]      | [491, 494, 498]      |      |     |         |     |         |     |
| LMNB1 16 28              | GGPTTPLSPTRLS      | P20700     | Na              | [23, 28]                  | [19, 20, 25]         |      |     |         |     |         |     |
| FIBA 569 581             | EPFSRGKSSSYSK      | P02671     | Na              | [572, 576, 577, 578, 580] | ]                    |      |     |         |     |         |     |
| ERBB2 679 691            | QOKIRKYTMRRLL      | P04626     | Na              | ]                         | [686]                |      |     |         |     |         |     |
| ADDB 708 718             | KKKFRTPSFLKKS      | P35612     | Na              | [713, 718]                | [711]                |      |     |         |     |         |     |
| H32 3 18                 | RTKQTARKSTGGKAPR   | Q71D13     | Na              | [11]                      | [4, 7, 12]           |      |     |         |     |         |     |
| IFAE 203 215             | TATKSGSTTKNRF      | P06730     | Na              | [207, 209]                | [203, 205, 210, 211] |      |     |         |     |         |     |
| MIPI3 208 220            | RSGLYRSPSPMPEN     | P30307     | Na              | [209, 214, 216]           | ]                    |      |     |         |     |         |     |
| KPCB 626 639             | AENDFRFFTRHPPV     | P05771-2   | Na              | ]                         | [634]                |      |     |         |     |         |     |
| MARCS 152 164            | KKKKKRFSFKKSF      | P29966     | Na              | [159, 163]                | ]                    |      |     |         |     |         |     |
| KAPCG 192 206            | VKGRTWTLGKTPPEYL   | P22612     | Na              | ]                         | [196, 198, 202]      |      |     |         |     |         |     |
| MARCS 160 172            | FKKSFKLGGFSFK      | P29966     | Na              | [163, 167, 170]           | ]                    |      |     |         |     |         |     |
| NEK3 158 170             | FACTYVGTPYYVP      | P51956     | Na              | ]                         | [161, 165]           |      |     |         |     |         |     |
| NEK2 172 184             | FAKTVFGTPYYMS      | P51955     | Na              | [184]                     | [175, 179]           |      |     |         |     |         |     |

| ID                 | Sequence          | Uniprot ID | Tyr                | Ser                            | Thr        | WT   |     | CIRS1KO |     | CIRS2KO |     |
|--------------------|-------------------|------------|--------------------|--------------------------------|------------|------|-----|---------|-----|---------|-----|
|                    |                   |            |                    |                                |            | Sham | TAC | Sham    | TAC | Sham    | TAC |
| CDC2 154 169       | GIPIRVYTHEVVTLWY  | P06493     | Na                 | ∅                              | [161, 166] |      |     |         |     |         |     |
| ACM1 421 433       | CNKAFRDTFRLLL     | P11229     | Na                 | ∅                              | [428]      |      |     |         |     |         |     |
| RB 803 815         | NIYISPLKSPYKI     | P06400     | Na                 | [807, 811]                     | ∅          |      |     |         |     |         |     |
| DCX 49 61          | HFDERDKTSRNMNR    | O43602     | Na                 | [57]                           | [56]       |      |     |         |     |         |     |
| KS6A1 374 386      | QLFRGFSFVATGL     | Q15418     | Na                 | [380]                          | [384]      |      |     |         |     |         |     |
| CA2D1 494 506      | LEDIKRLTPRFTL     | P54289     | Na                 | ∅                              | [501, 505] |      |     |         |     |         |     |
| P53 12 24          | PPLSQETFSDLWK     | P04637     | Na                 | [15, 20]                       | [18]       |      |     |         |     |         |     |
| C1R 201 213        | ASGYISSLEYPRS     | P00736     | Na                 | [202, 206, 207, 213]           | ∅          |      |     |         |     |         |     |
| CD27 212 224       | HQRRKYRSNKGES     | P26842     | Na                 | [219, 224]                     | ∅          |      |     |         |     |         |     |
| VGFR1 1326 1338    | DYNSVLYSTPPI      | P17948     | [1327, 1333]       | Na                             | Na         |      |     |         |     |         |     |
| FAK1 569 581       | RYMEDSTYYKASK     | Q05397     | [570, 576, 577]    | Na                             | Na         |      |     |         |     |         |     |
| PGFRB 1014 1028    | PNEGNDNDYIPLDP    | P09619     | [1021]             | Na                             | Na         |      |     |         |     |         |     |
| LAT 249 261        | EEGAPDYENLQEL     | O43561     | [255]              | Na                             | Na         |      |     |         |     |         |     |
| ANXA1 14 26        | IENEEQYYQTVK      | P04083     | [21]               | Na                             | Na         |      |     |         |     |         |     |
| EPHB1 771 783      | DDTSDPIYTSLSG     | P54762     | [778]              | Na                             | Na         |      |     |         |     |         |     |
| LCK 387 399        | RLIEDNEYTAREG     | P06239     | [394]              | Na                             | Na         |      |     |         |     |         |     |
| EPHA7 607 619      | TYIDPETYEDPNR     | Q15375     | [608, 614]         | Na                             | Na         |      |     |         |     |         |     |
| JAK2 563 577       | VRREVGDIYGGQLHETE | O60674     | [570]              | Na                             | Na         |      |     |         |     |         |     |
| FES 706 718        | REEADGVYAASGLG    | P07332     | [713]              | Na                             | Na         |      |     |         |     |         |     |
| CD79A 181 193      | EYEDENLYEGLNL     | P11912     | [182, 188]         | Na                             | Na         |      |     |         |     |         |     |
| FRK 380 392        | KVDNEDIYESRHE     | P42685     | [387]              | Na                             | Na         |      |     |         |     |         |     |
| ENOG 37 49         | SGASTGIYEAL       | P09104     | [44]               | Na                             | Na         |      |     |         |     |         |     |
| PGFRB 572 584      | VSSDGHEYIYVDP     | P09619     | [579, 581]         | Na                             | Na         |      |     |         |     |         |     |
| EPOR 361 373       | SEHAQDTYLVLDK     | P19235     | [368]              | Na                             | Na         |      |     |         |     |         |     |
| ZAP70 485 497      | ALGADDSYYTARS     | P43403     | [492, 493]         | Na                             | Na         |      |     |         |     |         |     |
| PDPK1 2 14         | ARTTSQLYDAVPI     | O15530     | [9]                | Na                             | Na         |      |     |         |     |         |     |
| FAK2 572 584       | RYIEDDYKASV       | Q14289     | [573, 579, 580]    | Na                             | Na         |      |     |         |     |         |     |
| MET 1227 1239      | RDMDYKEYYSVHN     | P08581     | [1230, 1234, 1235] | Na                             | Na         |      |     |         |     |         |     |
| EFS 246 258        | GGTDEGIYDVPL      | O43281     | [253]              | Na                             | Na         |      |     |         |     |         |     |
| 41 654 666         | LDGENIYIRHNSL     | P11171     | [660]              | Na                             | Na         |      |     |         |     |         |     |
| SRC8 CHICK 492 504 | YQAEENTYDEYEN     | Q01406     | [492, 499, 502]    | Na                             | Na         |      |     |         |     |         |     |
| SRC8 CHICK 476 488 | EYEPETVYEVAGA     | Q01406     | [477, 483]         | Na                             | Na         |      |     |         |     |         |     |
| CDK2 8 20          | EKIGEGTYGVVYK     | P24941     | [15, 19]           | Na                             | Na         |      |     |         |     |         |     |
| PECA1 706 718      | KKDITETVYSEVRK    | P16284     | [713]              | Na                             | Na         |      |     |         |     |         |     |
| RASA1 453 465      | TVDGKEIYNIR       | P20936     | [460]              | Na                             | Na         |      |     |         |     |         |     |
| RET 1022 1034      | TPSDSLIYDDGLS     | P07949     | [1029]             | Na                             | Na         |      |     |         |     |         |     |
| P85A 600 612       | NENTEDQYSLVED     | P27986     | [607]              | Na                             | Na         |      |     |         |     |         |     |
| EPHA2 765 777      | EDDPEATYTTSGG     | P29317     | [772]              | Na                             | Na         |      |     |         |     |         |     |
| EPHA1 774 786      | LDLDFDGTETGGG     | P21709     | [781]              | Na                             | Na         |      |     |         |     |         |     |
| VGFR2 989 1001     | EEAPEDLYKDFLT     | P35968     | [996]              | Na                             | Na         |      |     |         |     |         |     |
| FER 707 719        | RQEDGGVYSSSGL     | P16591     | [714]              | Na                             | Na         |      |     |         |     |         |     |
| PLCG1 764 776      | IGTAEPDYGALYE     | P19174     | [771, 775]         | Na                             | Na         |      |     |         |     |         |     |
| PAXI 111 123       | VGEEHHVYFFPNK     | P49023     | [118]              | Na                             | Na         |      |     |         |     |         |     |
| RON 1346 1358      | SALLGDHYVQLPA     | Q04912     | [1353]             | Na                             | Na         |      |     |         |     |         |     |
| MK12 178 190       | ADSEMTGVYVTRW     | P53778     | [185]              | Na                             | Na         |      |     |         |     |         |     |
| VGFR2 1168 1180    | AQQDGDYIVLPI      | P35968     | [1175]             | Na                             | Na         |      |     |         |     |         |     |
| JAK1 1015 1027     | AIETDKYYTVKD      | P23458     | [1022, 1023]       | Na                             | Na         |      |     |         |     |         |     |
| KPB1 1011 1023     | QVEFRRLSISAES     | P46020     | Na                 | [1018, 1020, 1023]             | ∅          |      |     |         |     |         |     |
| CFTR 730 742       | EPLERLLSLVPDS     | P13569     | Na                 | [737, 742]                     | ∅          |      |     |         |     |         |     |
| TY3H 65 77         | FIGRRQSLIEDAR     | P07101     | Na                 | [71]                           | ∅          |      |     |         |     |         |     |
| VASP 150 162       | EHIERRVSNAGGP     | P50552     | Na                 | [157]                          | ∅          |      |     |         |     |         |     |
| PLM 76 88          | EEGTFRRSIRRLS     | O00168     | Na                 | [82, 83, 88]                   | [79]       |      |     |         |     |         |     |
| EPB42 241 253      | LLNKRGSVPILR      | P16452     | Na                 | [248]                          | ∅          |      |     |         |     |         |     |
| CAC1C 1974 1986    | ASLGRRASFLHLEC    | Q13936     | Na                 | [1975, 1981]                   | ∅          |      |     |         |     |         |     |
| ADRB2 338 350      | ELLCLRRSSLKAY     | P07550     | Na                 | [345, 346]                     | ∅          |      |     |         |     |         |     |
| LIPS 944 956       | GFHPRRSSQGATQ     | Q05469     | Na                 | [950, 951]                     | [955]      |      |     |         |     |         |     |
| PTK6 436 448       | ALRERLSSTFSYE     | Q13882     | Na                 | [442, 443, 446]                | [445]      |      |     |         |     |         |     |
| STMN2 90 102       | AAGERRKSQEAQV     | Q93045     | Na                 | [97]                           | ∅          |      |     |         |     |         |     |
| REL 260 272        | KMQLRRPSDOEVS     | Q04864     | Na                 | [267, 272]                     | ∅          |      |     |         |     |         |     |
| KCNA3 461 473      | EELKARSNSTLS      | P22001     | Na                 | [468, 470, 473]                | [471]      |      |     |         |     |         |     |
| GPSM2 394 406      | PKLGRRHSMENME     | P81274     | Na                 | [401]                          | ∅          |      |     |         |     |         |     |
| KCNA1 438 450      | DSDSLRRSSSTMS     | Q09470     | Na                 | [439, 442, 445, 446, 447, 450] | [448]      |      |     |         |     |         |     |
| DESP 2842 2854     | RSGSRSSSFDATG     | P15924     | Na                 | [2843, 2845, 2849]             | [2853]     |      |     |         |     |         |     |
| MK10 216 228       | TSFMMTPYVYTRY     | P53779     | [223, 228]         | Na                             | Na         |      |     |         |     |         |     |
| VGFR2 1052 1064    | DIYKDPDYVRKGD     | P35968     | [1054, 1059]       | Na                             | Na         |      |     |         |     |         |     |
| MK01 180 192       | HTGFLTEYVATRW     | P28482     | [187]              | Na                             | Na         |      |     |         |     |         |     |
| PRRX2 202 214      | WTASSPYSTVPPY     | Q99811     | [208, 214]         | Na                             | Na         |      |     |         |     |         |     |
| CDK7 157 169       | GLAKSFGSPNRAY     | P50613     | [169]              | Na                             | Na         |      |     |         |     |         |     |
| CDK7 163 175       | GSPNRAYTHQVYT     | P50613     | Na                 | [164]                          | [170, 175] |      |     |         |     |         |     |
| EPHB4 583 595      | IGHGTVYIDPFT      | P54760     | [590]              | Na                             | Na         |      |     |         |     |         |     |
| EPHB1 921 933      | SAIKMVQYRDSFL     | P54762     | [928]              | Na                             | Na         |      |     |         |     |         |     |
| ZBT16 621 633      | LRTHNGASPYQCT     | Q05516     | [630]              | Na                             | Na         |      |     |         |     |         |     |
| FGFR2 762 774      | TLTNEEYDLSQ       | P21802     | [769]              | Na                             | Na         |      |     |         |     |         |     |
| NPT2A 501 513      | AKALGKRKTAKYRW    | Q06495     | [511]              | Na                             | Na         |      |     |         |     |         |     |
| MBP 198 210        | ARTAHYGLSPQKS     | P02686     | [203]              | Na                             | Na         |      |     |         |     |         |     |
| EPOR 419 431       | ASAAFEYITLDP      | P19235     | [426]              | Na                             | Na         |      |     |         |     |         |     |
| MBP 259 271        | FGYGGRASDYKSA     | P02686     | [261, 268]         | Na                             | Na         |      |     |         |     |         |     |
| CTNB1 79 91        | VADIDGQYAMTRA     | P35222     | [86]               | Na                             | Na         |      |     |         |     |         |     |
| VGFR3 1061 1073    | DIYKDPDYVRKGS     | P35916     | [1063, 1068]       | Na                             | Na         |      |     |         |     |         |     |
| VGFR2 944 956      | RFRQKQDYVGAIP     | P35968     | [951]              | Na                             | Na         |      |     |         |     |         |     |

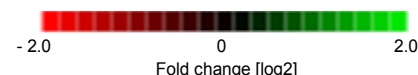

Changes are presented relative to Sham controls same genotype. Red indicates decreased signal intensity, green indicates increased signal intensity.

**Supplemental Table 10:** Prediction for activated upstream kinases four weeks post-TAC surgery

|                    | UniProt ID | Hits   | % Hits | Comb. Score |
|--------------------|------------|--------|--------|-------------|
| <b>WT TAC</b>      |            |        |        |             |
| mTOR/FRAP          | P42345     | 1.000  | 50.01  | 228.4       |
| PKG1 (PRKG1)       | Q13976     | 0.667  | 33.34  | 319.1       |
| PKACa (PRKACA)     | P17612     | 0.667  | 33.34  | 314.2       |
| PKACb (PRKACB)     | P22694     | 0.667  | 33.34  | 314.2       |
| Akt1 (PKBa)        | P31749     | 0.667  | 33.34  | 250.4       |
| SGK2               | Q9HBY8     | 0.667  | 33.34  | 198.9       |
| <b>CIRS1KO TAC</b> |            |        |        |             |
| PKG2 (PRKG2)       | Q13237     | 14.580 | 56.08  | 6535.0      |
| PKG1 (PRKG1)       | Q13976     | 13.247 | 50.95  | 6020.4      |
| Pim3 (AL549548)    | P58750     | 11.416 | 43.91  | 6767.1      |
| MAPKAPK3           | Q16644     | 10.500 | 40.38  | 5061.0      |
| Pim1               | P11309     | 10.416 | 40.06  | 7000.2      |
| PRKX               | P51817     | 9.415  | 36.21  | 4462.5      |
| PKACa (PRKACA)     | P17612     | 8.915  | 34.29  | 4264.8      |

Significantly altered peptides were queried against the proprietary upstream kinase predictor from Kinexus ([www.phosphonet.ca](http://www.phosphonet.ca)). No upstream kinase activation was predicted for CIRS2KO hearts post-TAC surgery.

## Supplemental Figures

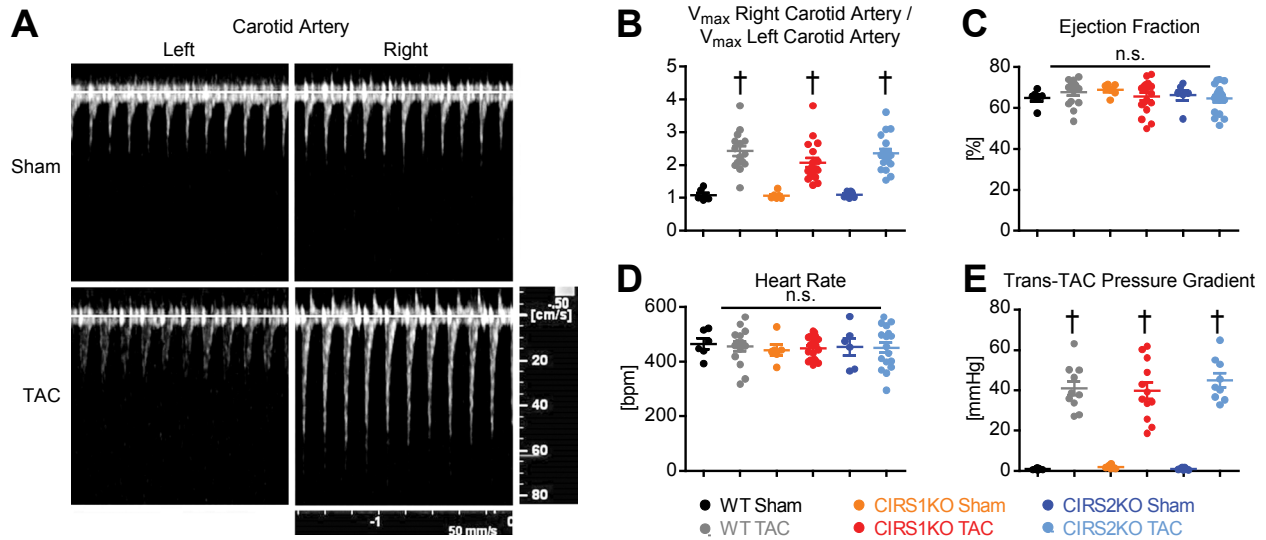

**Supplemental Figure 1:** Transverse aortic constriction (TAC) results in a similar increase in the pressure gradient independent of the genotype.

Two-way ANOVA was performed to analyze differences after TAC surgery by genotype, followed by Holm-Šídák post-hoc analysis (#  $p < 0.05$  for TAC surgery). (A) Representative images and (B) quantification of the measurements of peak velocity ( $V_{max}$ ) of the left and right carotid artery immediately post Sham or TAC surgery (#) as indicated. (C) Ejection fraction and (D) heart rate determined by transthoracic echocardiography immediately post Sham or TAC surgery (same echocardiographic data as presented in Supplemental Table 2);  $n=6$  for Sham groups,  $n=15-18$  for TAC groups. †  $p < 0.05$  vs. Sham same genotype. (E) TAC-induced pressure gradient as determined by pulsed-wave Doppler measurement of transverse aortic velocity distal the constriction,  $n=11-14$ . Two-way ANOVA was performed to analyze differences after TAC surgery by genotype, followed by Holm-Šídák post-hoc analysis. Data shown are mean values  $\pm$  SEM; n.s., no significant difference observed.

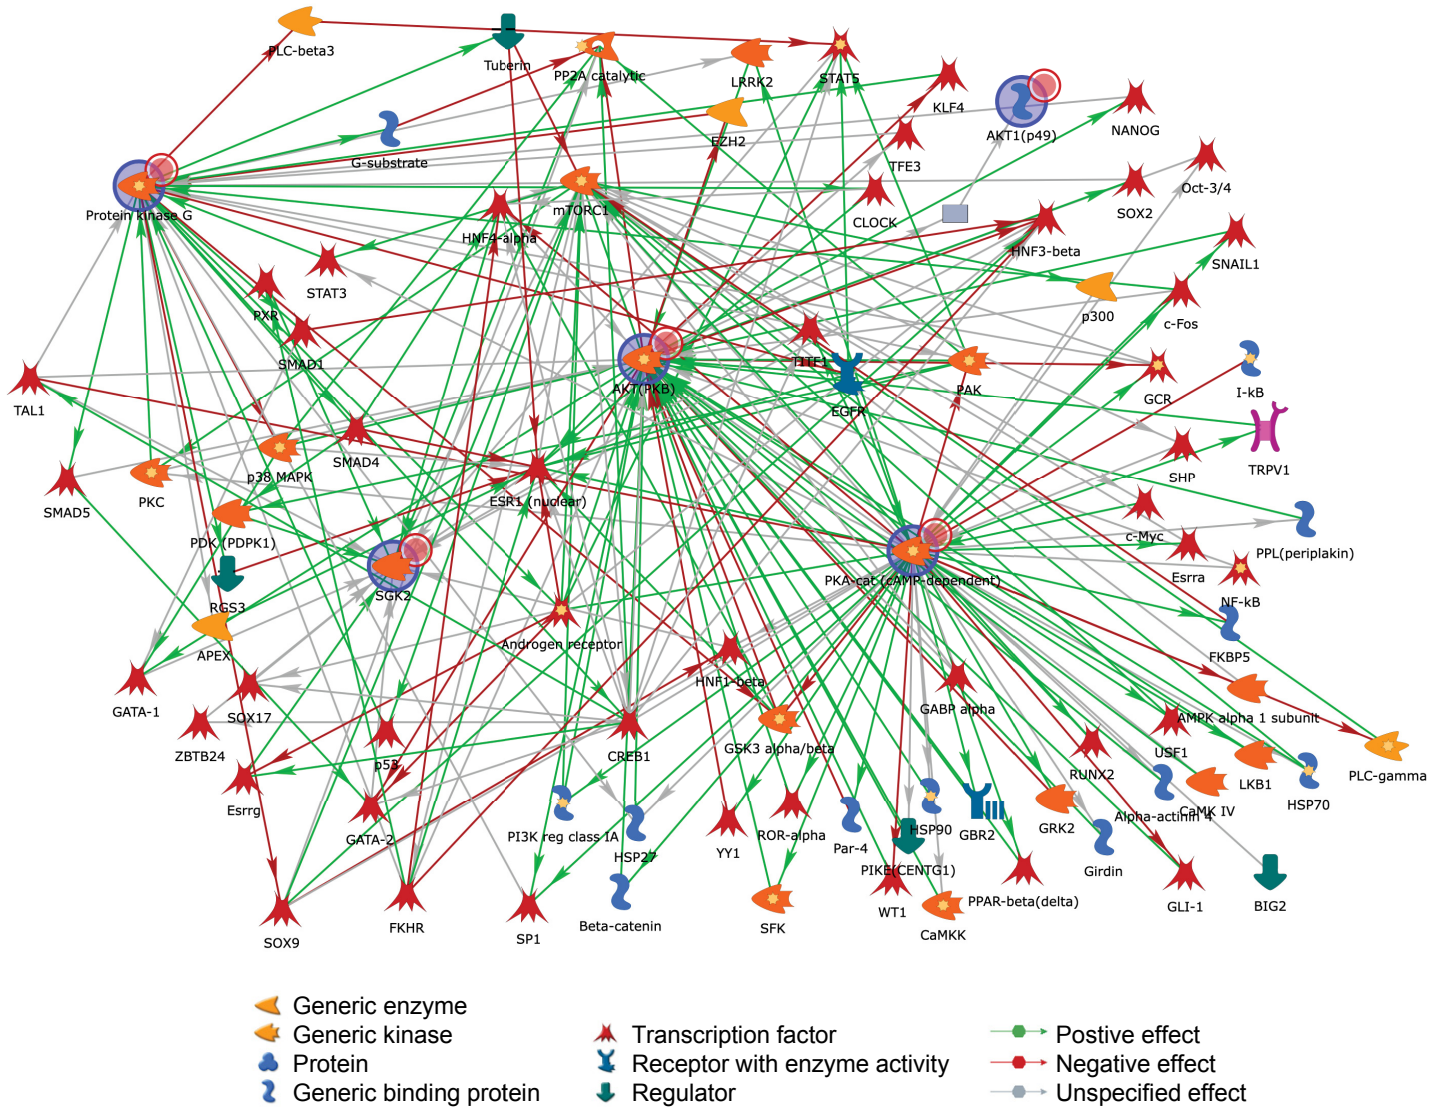

**Supplemental Figure 2: 3-step network for TAC regulated kinase pathways in WT hearts relative to Sham controls four weeks post-surgery.**



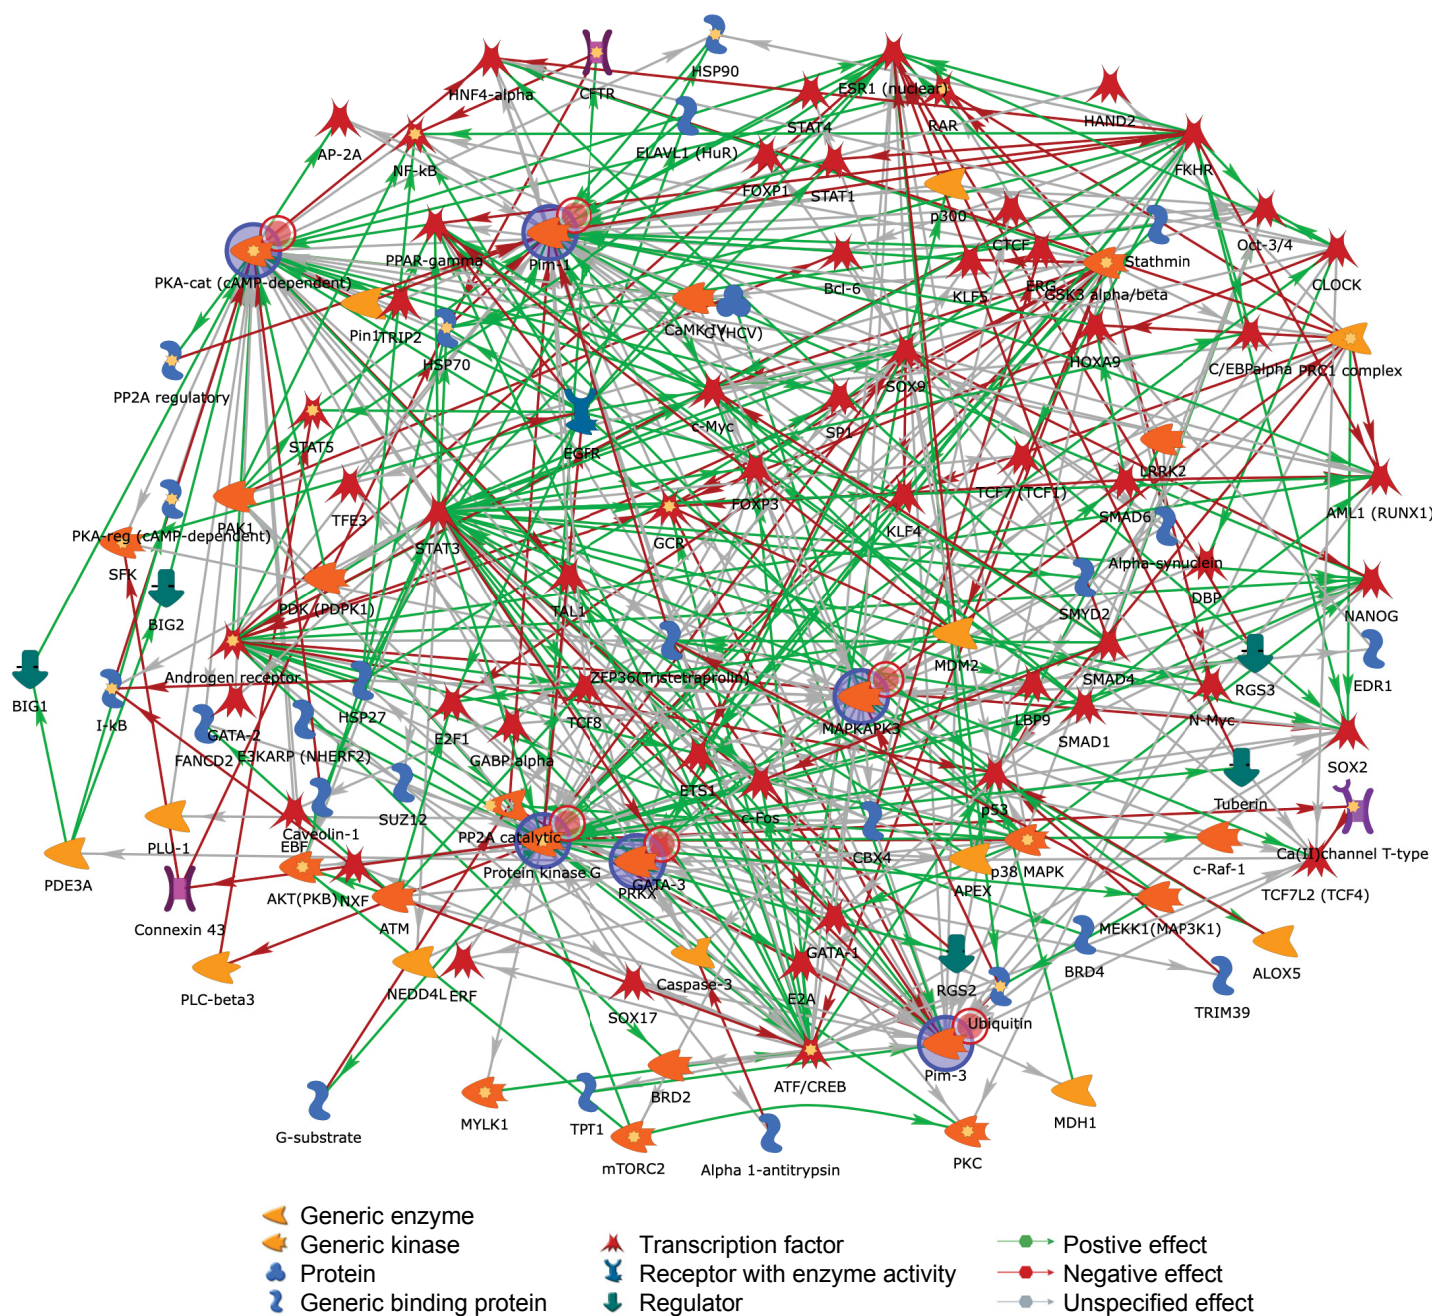

**Supplemental Figure 3:** 3-step network for TAC regulated kinase pathways in CIRS1KO hearts relative to Sham controls four weeks post-surgery.

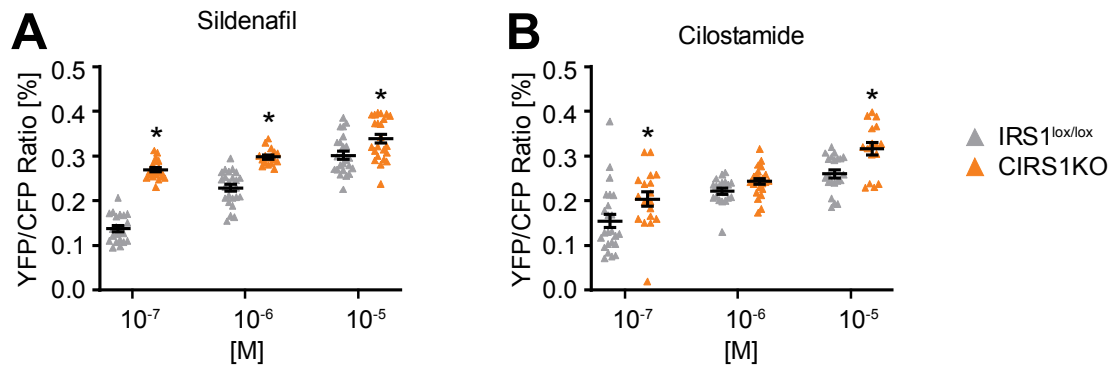

**Supplemental Figure 4:** ANP stimulated cGMP production in the presence of the PDE5 inhibitor Sildenafil and the PDE3 inhibitor Cilostamide.

ANP stimulated cGMP production in cardiomyocytes obtained from IRS1<sup>lox/lox</sup> and CIRS1KO mice measured by using the FRET-based cGMP sensor cGi-500 with or without varying concentrations of the (A) PDE5 inhibitor Sildenafil and (B) the PDE3 inhibitor Cilostamide. n=3-5 mice, n=16-25 cells / group total analyzed. Two-way ANOVA analysis was performed (p<0.05 for genotype, treatment and interaction between genotype and treatment) followed by Holm-Šidák post-hoc analysis, \* p<0.05 vs. IRS1<sup>lox/lox</sup> same inhibitor concentration. Data shown are mean values ± SEM.

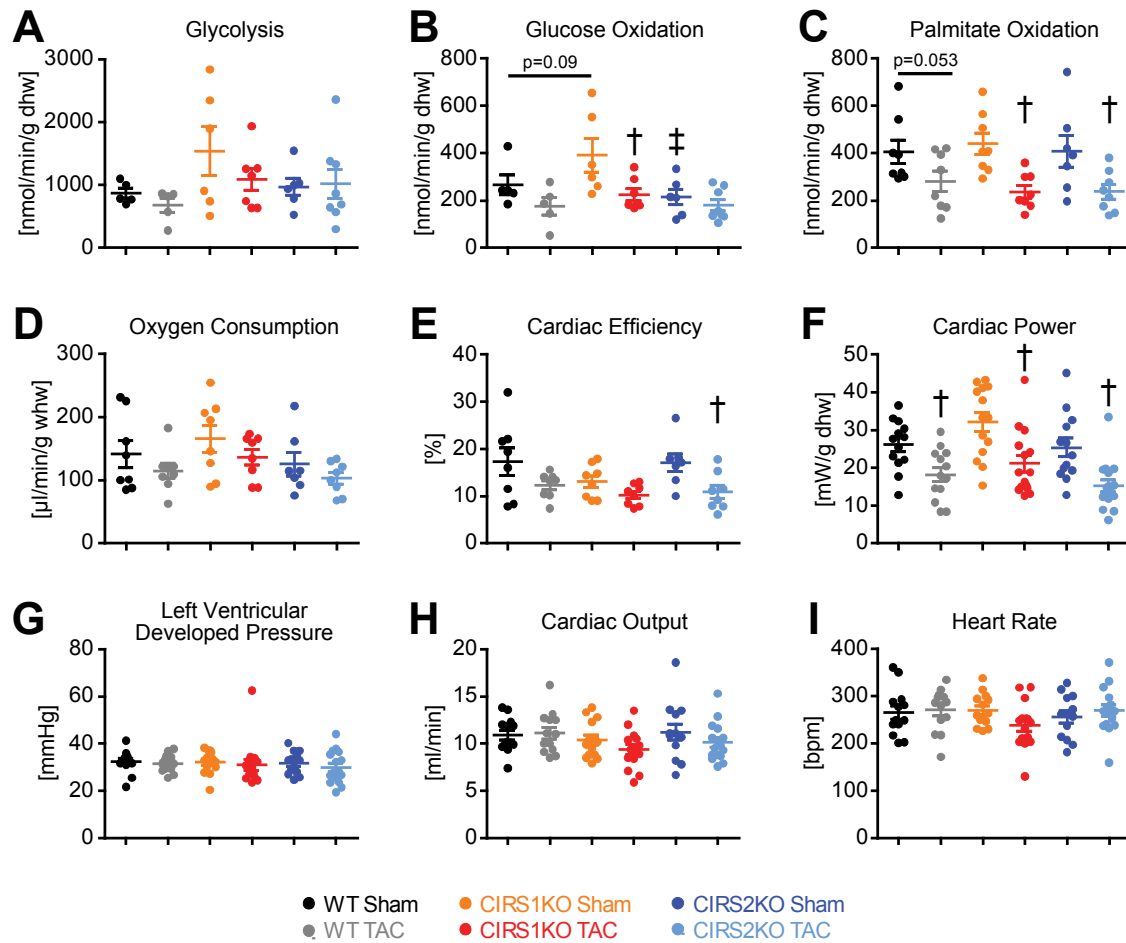

**Supplemental Figure 5:** Cardiac substrate metabolism and function in isolated working WT, CIRS1KO and CIRS2KO hearts four weeks post-surgery.

Two-way ANOVA was performed to analyze differences by four weeks after TAC surgery and genotype, followed by Holm-Šidák post-hoc analysis (#  $p<0.05$  for TAC surgery, \$  $p<0.05$  for genotype, and &  $p<0.05$  for the interaction between TAC surgery and genotype). (A) Glycolysis, (B) glucose oxidation (#,\$), (C) palmitate oxidation (#), (D) oxygen consumption, (E) cardiac efficiency (#), (F) cardiac power (#,\$), (G) developed pressure, (H) cardiac output, and (I) heart rate (&). Data shown are mean values  $\pm$  SEM. †  $p<0.05$  vs. Sham same genotype.  $n=5-8$  hearts per group for metabolism, oxygen consumption and cardiac efficiency;  $n=13-16$  for cardiac function (pooled data from glucose and palmitate perfusions).



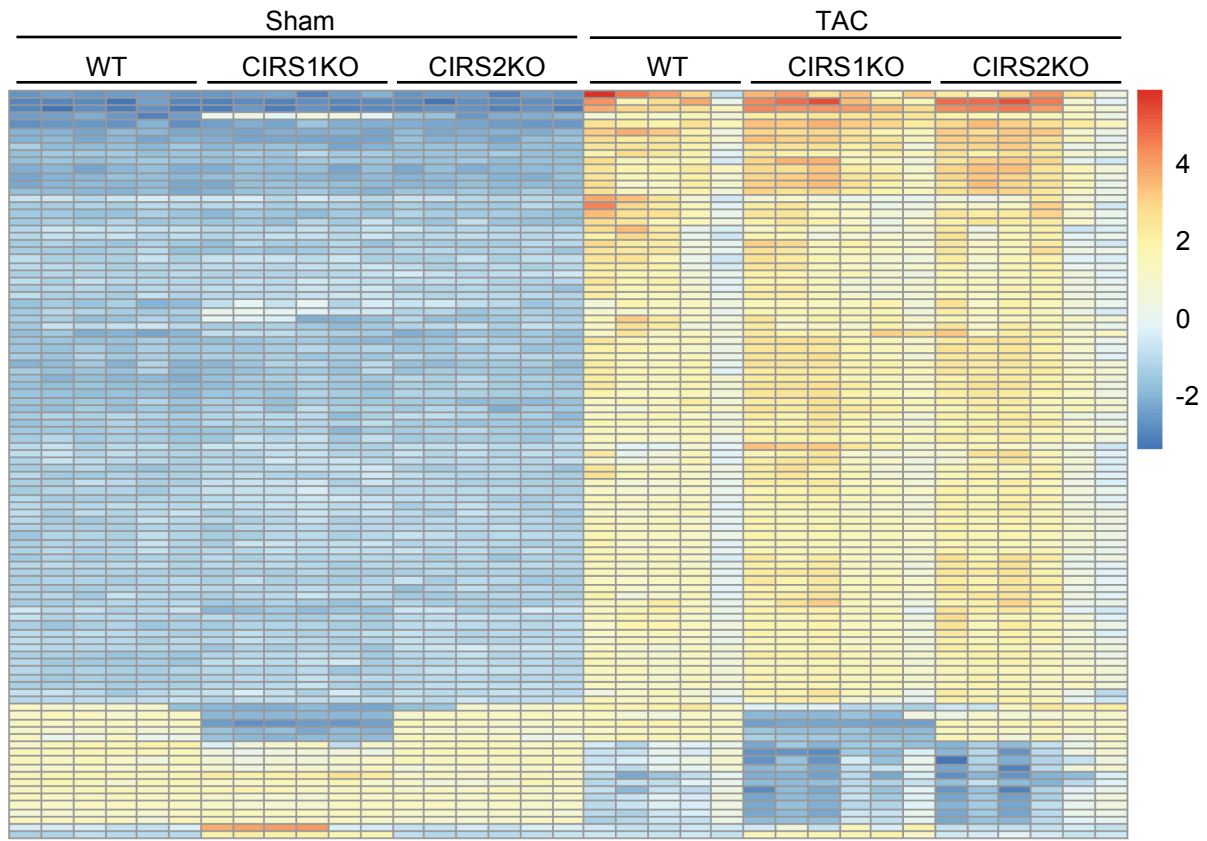

**Supplemental Figure 6:** *RNA sequencing quality control three days post-surgery.*

Heatmap of RNA sequencing count data corresponding to 100 genes with the greatest variance across samples. Data is clustered by row after applying the regularized log transformation function in DESeq2.

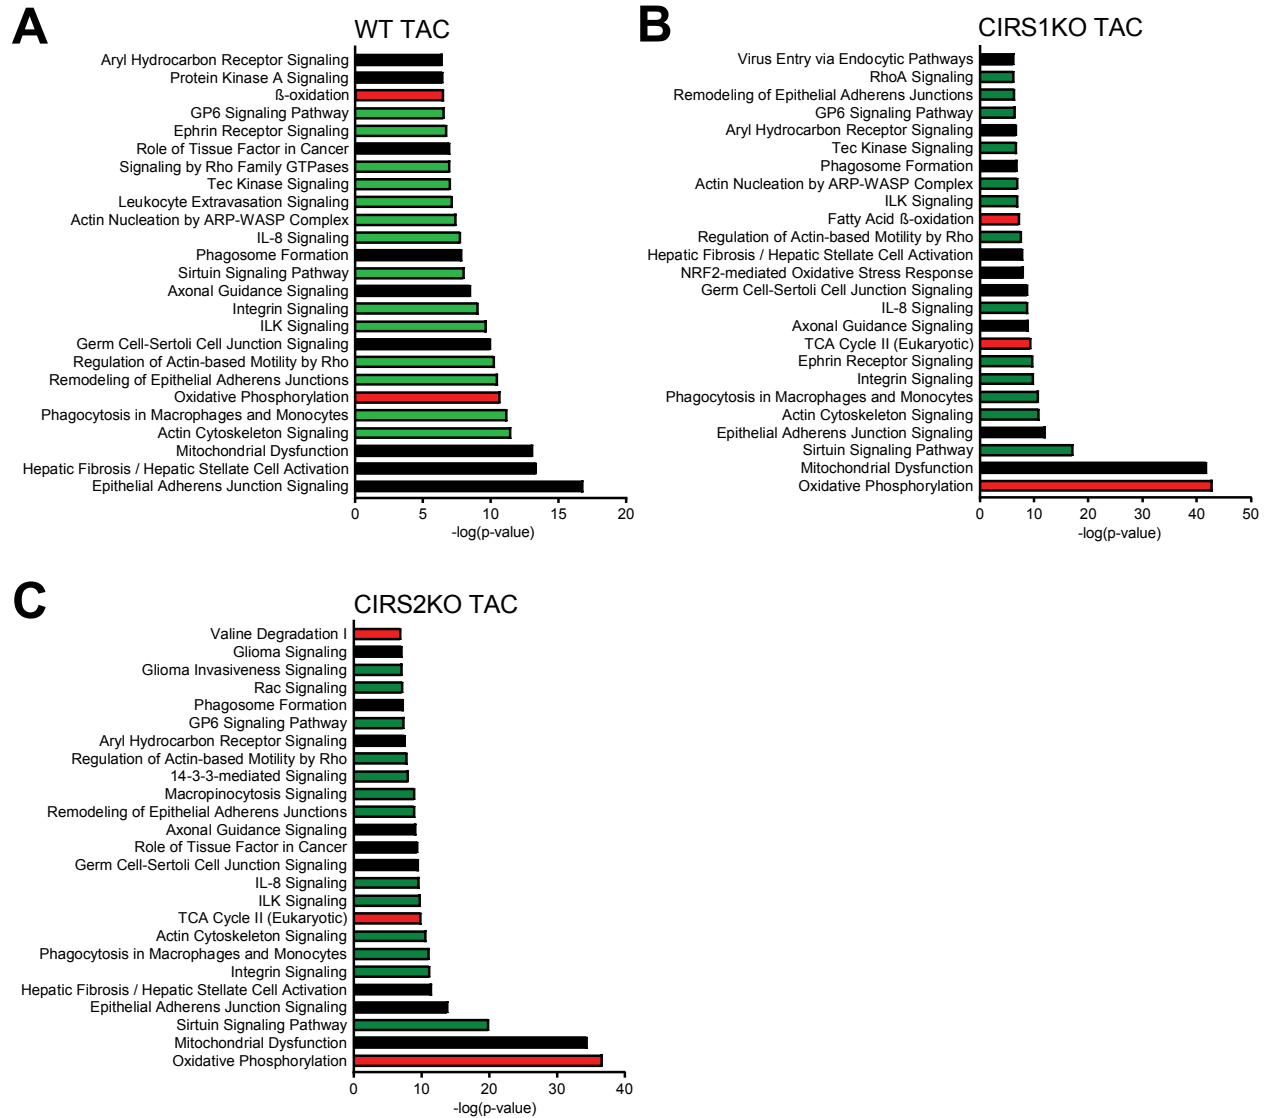

**Supplemental Figure 7: Common and unique pathways regulated in WT, CIRS1KO and CIRS2KO hearts three days post-TAC.**

Ingenuity pathway analysis indicates both common and unique pathways are enriched in WT (A), CIRS1KO (B), and CIRS2KO (C) TAC data sets. Several pathways are predicted to be inhibited (red, Z-score  $\leq -2$ ) or activated (green, Z-score  $\geq 2$ ).

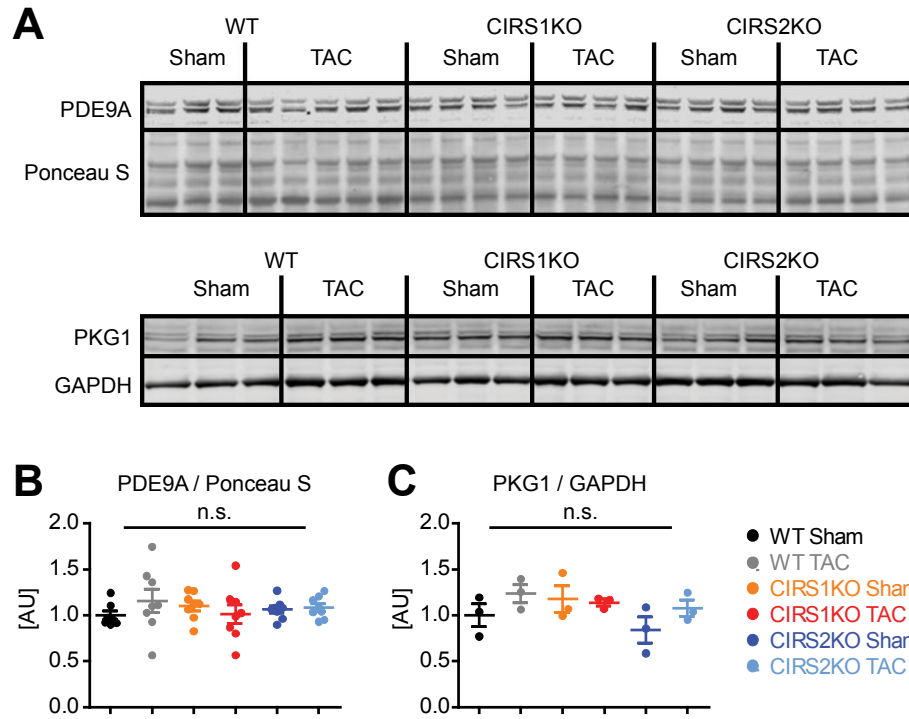

**Supplemental Figure 8:** (A) Representative immunoblots in ventricle homogenates of WT, CIRS1KO and CIRS2KO mice post-TAC surgery and densitometric quantification of (B) PDE9A normalized to Ponceau S (n=7-8), (C) PKG1 normalized to GAPDH (n=3). Two-way ANOVA was performed to analyze differences four weeks after TAC surgery by genotype, followed by Holm-Šídák post-hoc analysis. n.s., no significant difference observed. Data shown are mean values  $\pm$  SEM.

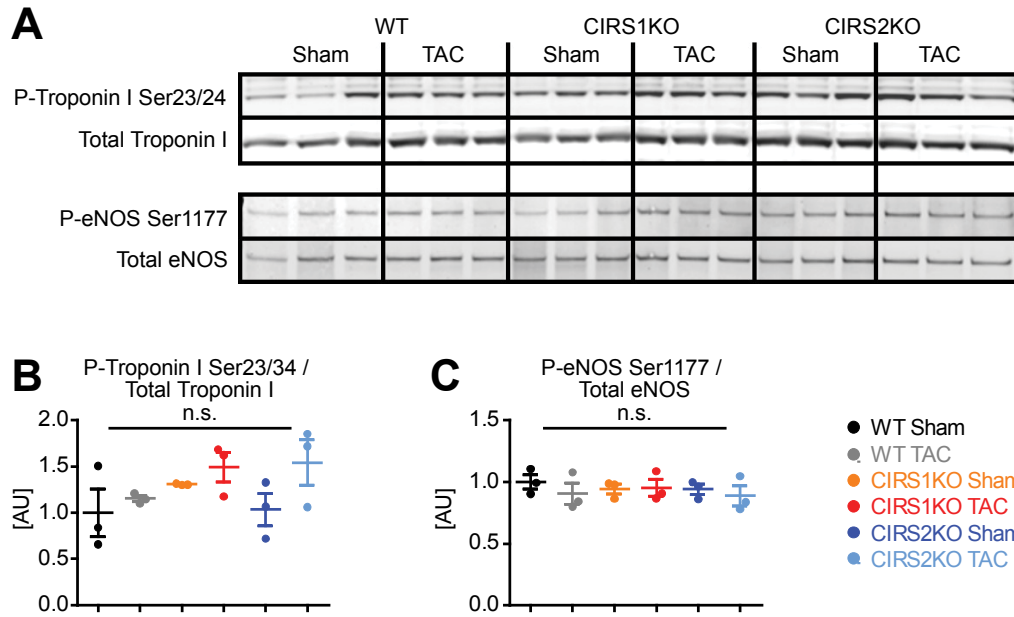

**Supplemental Figure 9:** (A) Representative immunoblots in ventricle homogenates of WT, CIRS1KO and CIRS2KO mice post-TAC surgery and densitometric quantification of (B) P-Troponin I Ser23/24 / Total Troponin I (n=3), (C) P-eNOS Ser1177 / Total eNOS (n=3). Two-way ANOVA was performed to analyze differences four weeks after TAC surgery by genotype, followed by Holm-Šídák post-hoc analysis. n.s., no significant difference observed. Data shown are mean values  $\pm$  SEM.

## **Supplemental References**

1. Pereira RO, Wende AR, Crum A, Hunter D, Olsen CD, Rawlings T, et al. Maintaining PGC-1alpha expression following pressure overload-induced cardiac hypertrophy preserves angiogenesis but not contractile or mitochondrial function. *FASEB journal : official publication of the Federation of American Societies for Experimental Biology*. 2014;28(8):3691-702.
2. Riehle C, Wende AR, Zaha VG, Pires KM, Wayment B, Olsen C, et al. PGC-1beta deficiency accelerates the transition to heart failure in pressure overload hypertrophy. *Circ Res*. 2011;109(7):783-93.
3. Bhan A, Sirker A, Zhang J, Protti A, Catibog N, Driver W, et al. High-frequency speckle tracking echocardiography in the assessment of left ventricular function and remodeling after murine myocardial infarction. *American journal of physiology Heart and circulatory physiology*. 2014;306(9):H1371-83.
4. El Accaoui RN, Gould ST, Hajj GP, Chu Y, Davis MK, Kraft DC, et al. Aortic valve sclerosis in mice deficient in endothelial nitric oxide synthase. *American journal of physiology Heart and circulatory physiology*. 2014;306(9):H1302-13.
5. Hill JA, Karimi M, Kutschke W, Davisson RL, Zimmerman K, Wang Z, et al. Cardiac hypertrophy is not a required compensatory response to short-term pressure overload. *Circulation*. 2000;101(24):2863-9.
6. Li YH, Reddy AK, Ochoa LN, Pham TT, Hartley CJ, Michael LH, et al. Effect of age on peripheral vascular response to transverse aortic banding in mice. *The journals of gerontology Series A, Biological sciences and medical sciences*. 2003;58(10):B895-9.
7. Baumgarten G, Knuefermann P, Kalra D, Gao F, Taffet GE, Michael L, et al. Load-dependent and -independent regulation of proinflammatory cytokine and cytokine receptor gene expression in the adult mammalian heart. *Circulation*. 2002;105(18):2192-7.
8. Mohammed SF, Storlie JR, Oehler EA, Bowen LA, Korinek J, Lam CS, et al. Variable phenotype in murine transverse aortic constriction. *Cardiovascular pathology : the official journal of the Society for Cardiovascular Pathology*. 2012;21(3):188-98.
9. Mandarim-de-Lacerda CA. Stereological tools in biomedical research. *An Acad Bras Cienc*. 2003;75(4):469-86.
10. Anderson JC, Duarte CW, Welaya K, Rohrbach TD, Bredel M, Yang ES, et al. Kinomic exploration of temozolomide and radiation resistance in Glioblastoma multiforme xenolines. *Radiotherapy and oncology : journal of the European Society for Therapeutic Radiology and Oncology*. 2014;111(3):468-74.
11. Jarboe JS, Jaboin JJ, Anderson JC, Nowsheen S, Stanley JA, Naji F, et al. Kinomic profiling approach identifies Trk as a novel radiation modulator. *Radiotherapy and oncology : journal of the European Society for Therapeutic Radiology and Oncology*. 2012;103(3):380-7.
12. Anderson JC, Minnich DJ, Dobelbower MC, Denton AJ, Dussaq AM, Gilbert AN, et al. Kinomic profiling of electromagnetic navigational bronchoscopy specimens: a new approach for personalized medicine. *PloS one*. 2014;9(12):e116388.
13. Love MI, Huber W, and Anders S. Moderated estimation of fold change and dispersion for RNA-seq data with DESeq2. *Genome Biol*. 2014;15(12):550.
14. Anders S, Pyl PT, and Huber W. HTSeq—a Python framework to work with high-throughput sequencing data. *Bioinformatics*. 2015;31(2):166-9.
15. Devereux RB, Alonso DR, Lutas EM, Gottlieb GJ, Campo E, Sachs I, et al. Echocardiographic assessment of left ventricular hypertrophy: comparison to necropsy findings. *The American journal of cardiology*. 1986;57(6):450-8.
16. Lang RM, Bierig M, Devereux RB, Flachskampf FA, Foster E, Pellikka PA, et al. Recommendations for chamber quantification: a report from the American Society of Echocardiography's Guidelines and Standards Committee and the Chamber Quantification Writing Group, developed in conjunction with the European Association of Echocardiography, a branch of the European Society of Cardiology. *Journal of the American Society of Echocardiography : official publication of the American Society of Echocardiography*. 2005;18(12):1440-63.
